# Supplementary material
Source: PubMed Central journal article supplement (PMC3946863)
Supplement: NIHMS535682-supplement-01.pdf [file NIHMS535682-supplement-01.pdf]

# Supplement – Gene Expression and Genetic Variation in Human Atria

## Table of Contents

### Supplemental Methods and Results

**Supplemental Table 1a.** Over-expressed transcripts in LA

**Supplemental Table 1b.** Over-expressed transcripts in RA

**Supplemental Table 2.** Comparison with top 20 differentially expressed genes reported in recently published article.<sup>1</sup>

**Supplemental Table 3a.** Top *cis*-associations in LA

**Supplemental Table 3b.** Top *cis*-associations in RA

**Supplemental Table 4.** Differentially expressed transcripts between LA and RA identified from samples from heart transplantation

**Supplemental Table 5.** Top 10 differentially expressed genes between LA and RA in samples from healthy donors

**Supplemental Table 6.** qPCR primer pairs

**Supplemental Table 7a.** Genes differentially expressed in heart failure cases vs. referents in LA

**Supplemental Table 7b.** Genes differentially expressed in heart failure cases vs. referents in RA

**Supplemental Table 8.** Differentially expressed genes ( $P < 4.2 \times 10^{-6}$ ) in patients with history of AF cases in RA by the leave-one-out cross validation

**Supplemental Table 9.** Top 10 differentially expressed genes between LA and RA in samples with history of AF

**Supplemental Figure 1.** Principle component analysis of transcriptional profiles

## Supplement – Gene Expression and Genetic Variation in Human Atria

### Supplemental Methods and Results

#### False Discovery Rate Estimated by Permutation Test

We employed an empirical false discovery rate (FDR) to account multiple testing and the linkage disequilibrium between SNPs and co-expression between genes.<sup>2</sup> At each permutation, the sample labels of gene expression were randomized, and then we tested their association with genetic variations. FDR was estimated as the ratio of average number of associations from the permuted samples to the actual number of associations in the real data.<sup>2</sup> A total of 1,000 permutations were performed to obtain stable FDR estimation, and the significance was claimed for the association with an FDR less than 5%. FDR was estimated separately for *cis*-eQTLs and *trans*-eQTLs. The association analysis was performed using linear regression function from GNU Scientific Library (<http://www.gnu.org/software/gsl/>) and validated using R software package ([www.r-project.org/](http://www.r-project.org/)).

#### qPCR Confirmation

For DNA extraction, the tissues were digested in 200ul DirectPCR solution (VIAGEN Biotech Inc, Los Angeles, CA) containing about 80 ug of Proteinase K followed by phenol:chloroform:isoamyl alcohol extraction and ethanol precipitation. The region containing rs3740293 was amplified by standard PCR reaction. The band of the appropriate size was excised, the gel was extracted and then sequenced by Sanger sequencing.

For RNA extraction, the tissues were homogenized in 1 ml of TRIZOL<sup>®</sup> Reagent (Life Technologies, Carlsbad, CA) after addition of chloroform. The centrifugation aqueous phase was then collected, and mixed with an equal amount of 100% ethanol and purified on the RNeasy column according manufacturer's instructions. The reverse transcription reaction was

## Supplement – Gene Expression and Genetic Variation in Human Atria

performed using iScript kit (Bio-Rad Laboratories, Hercules, CA) according to manufacturer's instructions. We then performed qPCR using iTaq SYBR-green reagent (Bio-Rad) on CFX384 Real-Time System. Conditions for qPCR were 50°C for 2 min, 95°C for 10 min, 95°C for 15 sec, 60°C for 1 min (last two steps was repeated for 40 times). Cq values were exported and relative expression was calculated. Each experiment was replicated with three different pairs of primers for *MYOZ1* and two different pairs of primers for *SYNPO2L*. The primer sequences are listed in **Supplemental Table 6**.

### Differential Gene Expression for Heart Failure and AF

We also compared the differential gene expression in participants with and without heart failure separately in LA and RA tissues. Three genes were differentially expressed in LA (**Supplemental Table 7a**), and 16 genes were differentially expressed in RA (**Supplemental Table 7b**). However, none of the differentially expressed genes were shared between LA and RA tissues. We also compared the differential gene expression in participants with and without AF. The analysis of differential expression did not identify any significant gene in LA. Only two genes, *PPM1H* ( $P=1.6 \times 10^{-6}$ ) and *DEXI* ( $P=2.5 \times 10^{-6}$ ) were found to be under-expressed in RA in the participants with AF, and no genes were over-expressed. The lack of significant genes might be attributable to the small number of samples had history of AF or without HF, which might result in the lack of power to identify differentially expressed genes consistently (**Supplemental Table 8**).

We then performed additional analysis by limiting samples with history of AF. As shown in the **Supplemental Table 9**, the most significant differentially expressed gene was *IL10* ( $P=3.0 \times 10^{-4}$ ),

## **Supplement – Gene Expression and Genetic Variation in Human Atria**

which did not reach the Bonferroni P-value cutoff ( $P=4.2 \times 10^{-6}$ ), probably due to that only 9 out of 64 samples had history of AF.

## Supplement – Gene Expression and Genetic Variation in Human Atria

**Table 1a.** Over-expressed transcripts in left atrial tissues (LA)

| ID          | Gene Symbol     | Left Atrium                     |      | Right Atrium                    |      | P value of two-sided t-test |
|-------------|-----------------|---------------------------------|------|---------------------------------|------|-----------------------------|
|             |                 | Average Expression <sup>§</sup> | SD   | Average Expression <sup>§</sup> | SD   |                             |
| 201272_at   | <i>AKR1B1</i>   | 9.81                            | 0.37 | 9.29                            | 0.26 | 6.0x10 <sup>-13</sup>       |
| 210372_s_at | <i>TPD52L1</i>  | 6.21                            | 0.37 | 5.65                            | 0.33 | 7.6x10 <sup>-13</sup>       |
| 204776_at   | <i>THBS4</i>    | 8.73                            | 0.69 | 7.72                            | 0.67 | 9.4x10 <sup>-12</sup>       |
| 207558_s_at | <i>PITX2</i>    | 4.00                            | 0.30 | 3.62                            | 0.20 | 1.7x10 <sup>-11</sup>       |
| 219719_at   | <i>HIGD1B</i>   | 7.44                            | 0.24 | 7.10                            | 0.25 | 2.6x10 <sup>-10</sup>       |
| 203786_s_at | <i>TPD52L1</i>  | 8.57                            | 0.39 | 8.08                            | 0.32 | 2.6x10 <sup>-10</sup>       |
| 208335_s_at | <i>DARC</i>     | 7.61                            | 0.46 | 7.01                            | 0.44 | 5.0x10 <sup>-10</sup>       |
| 203700_s_at | <i>DIO2</i>     | 5.66                            | 0.21 | 5.39                            | 0.19 | 5.3x10 <sup>-10</sup>       |
| 209047_at   | <i>AQP1</i>     | 9.29                            | 0.28 | 8.92                            | 0.29 | 1.2x10 <sup>-9</sup>        |
| 206768_at   | <i>RPL3L</i>    | 8.05                            | 0.29 | 7.67                            | 0.31 | 2.2x10 <sup>-9</sup>        |
| 204174_at   | <i>ALOX5AP</i>  | 7.28                            | 0.30 | 6.92                            | 0.28 | 7.1x10 <sup>-9</sup>        |
| 219728_at   | <i>MYOT</i>     | 7.43                            | 1.14 | 6.36                            | 0.57 | 3.9x10 <sup>-8</sup>        |
| 210299_s_at | <i>FHL1</i>     | 8.62                            | 0.44 | 8.16                            | 0.38 | 7.6x10 <sup>-8</sup>        |
| 218856_at   | <i>TNFRSF21</i> | 7.25                            | 0.30 | 6.88                            | 0.34 | 7.6x10 <sup>-8</sup>        |
| 204606_at   | <i>CCL21</i>    | 7.24                            | 0.33 | 6.91                            | 0.24 | 1.1x10 <sup>-7</sup>        |
| 214505_s_at | <i>FHL1</i>     | 10.30                           | 0.47 | 9.77                            | 0.48 | 1.5x10 <sup>-7</sup>        |
| 206637_at   | <i>P2RY14</i>   | 4.35                            | 0.52 | 3.89                            | 0.24 | 1.6x10 <sup>-7</sup>        |
| 218412_s_at | <i>GTF2IRD1</i> | 6.89                            | 0.18 | 6.71                            | 0.15 | 3.0x10 <sup>-7</sup>        |
| 217014_s_at | <i>AZGP1</i>    | 7.14                            | 0.32 | 6.82                            | 0.28 | 3.1x10 <sup>-7</sup>        |
| 217848_s_at | <i>PPA1</i>     | 9.54                            | 0.31 | 9.21                            | 0.30 | 4.4x10 <sup>-7</sup>        |
| 212793_at   | <i>DAAM2</i>    | 6.66                            | 0.19 | 6.46                            | 0.20 | 6.5x10 <sup>-7</sup>        |
| 204482_at   | <i>CLDN5</i>    | 7.13                            | 0.25 | 6.86                            | 0.27 | 6.9x10 <sup>-7</sup>        |

## Supplement – Gene Expression and Genetic Variation in Human Atria

|             |               |       |      |      |      |                      |
|-------------|---------------|-------|------|------|------|----------------------|
| 201539_s_at | <i>FHL1</i>   | 8.93  | 0.56 | 8.35 | 0.57 | 8.2X10 <sup>-7</sup> |
| 218966_at   | <i>MYO5C</i>  | 7.39  | 0.29 | 7.14 | 0.20 | 1.1X10 <sup>-6</sup> |
| 215177_s_at | <i>ITGA6</i>  | 7.53  | 0.25 | 7.28 | 0.25 | 1.2X10 <sup>-6</sup> |
| 209309_at   | <i>AZGP1</i>  | 5.11  | 0.49 | 4.67 | 0.38 | 1.3X10 <sup>-6</sup> |
| 203548_s_at | <i>LPL</i>    | 9.51  | 0.72 | 8.75 | 0.80 | 1.3X10 <sup>-6</sup> |
| 203549_s_at | <i>LPL</i>    | 10.41 | 0.65 | 9.73 | 0.70 | 1.6X10 <sup>-6</sup> |
| 205226_at   | <i>PDGFRL</i> | 6.21  | 0.46 | 5.75 | 0.46 | 1.8X10 <sup>-6</sup> |
| 211113_s_at | <i>ABCG1</i>  | 6.37  | 0.17 | 6.20 | 0.16 | 2.4X10 <sup>-6</sup> |
| 206227_at   | <i>CILP</i>   | 7.87  | 0.41 | 7.49 | 0.39 | 3.1X10 <sup>-6</sup> |
| 205257_s_at | <i>AMPH</i>   | 6.61  | 0.33 | 6.31 | 0.29 | 3.7X10 <sup>-6</sup> |
| 209924_at   | <i>CCL18</i>  | 7.29  | 0.69 | 6.70 | 0.54 | 3.9X10 <sup>-6</sup> |

---

<sup>5</sup>Average expression represents the mean expression of the transcript across all studied samples. It was calculated by summarizing signals from all the probes on the Affymetrix GeneChip Human Genome U133A Array that targeted the transcript using RMA algorithm.<sup>3</sup> The signal intensity from the probes was further log2 transformed. Higher values indicate higher expression for the same transcript.

## Supplement – Gene Expression and Genetic Variation in Human Atria

**Supplemental Table 1.** Over-expressed transcripts in right atrial tissues (RA)

| Gene ID     | Gene Symbol     | Left Atrium        |      | Right Atrium       |      | P value of two-sided t-test |
|-------------|-----------------|--------------------|------|--------------------|------|-----------------------------|
|             |                 | Average Expression | SD   | Average Expression | SD   |                             |
| 207069_s_at | <i>SMAD6</i>    | 7.12               | 0.33 | 7.77               | 0.32 | 2.3x10 <sup>-17</sup>       |
| 220491_at   | <i>HAMP</i>     | 7.68               | 0.77 | 9.35               | 0.91 | 4.0x10 <sup>-17</sup>       |
| 204790_at   | <i>SMAD7</i>    | 7.44               | 0.43 | 8.17               | 0.39 | 6.3X10 <sup>-15</sup>       |
| 204811_s_at | <i>CACNA2D2</i> | 7.18               | 0.34 | 7.79               | 0.39 | 1.0X10 <sup>-13</sup>       |
| 219873_at   | <i>COLEC11</i>  | 7.57               | 0.41 | 8.20               | 0.34 | 1.8X10 <sup>-13</sup>       |
| 202912_at   | <i>ADM</i>      | 8.42               | 0.49 | 9.15               | 0.42 | 1.2X10 <sup>-12</sup>       |
| 211959_at   | <i>IGFBP5</i>   | 10.49              | 0.42 | 11.13              | 0.41 | 3.1X10 <sup>-12</sup>       |
| 213094_at   | <i>GPR126</i>   | 4.84               | 0.34 | 5.43               | 0.42 | 3.5X10 <sup>-12</sup>       |
| 208292_at   | <i>BMP10</i>    | 6.81               | 0.80 | 8.21               | 1.01 | 4.3X10 <sup>-12</sup>       |
| 203146_s_at | <i>GABBR1</i>   | 7.68               | 0.14 | 7.90               | 0.14 | 5.0X10 <sup>-12</sup>       |
| 201565_s_at | <i>ID2</i>      | 7.64               | 0.46 | 8.30               | 0.42 | 9.3X10 <sup>-12</sup>       |
| 205554_s_at | <i>DNASE1L3</i> | 6.45               | 0.29 | 6.91               | 0.36 | 1.5X10 <sup>-10</sup>       |
| 201809_s_at | <i>ENG</i>      | 9.13               | 0.40 | 9.64               | 0.33 | 2.0X10 <sup>-10</sup>       |
| 206050_s_at | <i>RNH1</i>     | 8.69               | 0.21 | 8.99               | 0.23 | 7.5X10 <sup>-10</sup>       |
| 211958_at   | <i>IGFBP5</i>   | 7.56               | 0.32 | 8.04               | 0.40 | 1.5X10 <sup>-9</sup>        |
| 205374_at   | <i>SLN</i>      | 10.30              | 0.71 | 11.09              | 0.53 | 3.9X10 <sup>-9</sup>        |
| 221933_at   | <i>NLGN4X</i>   | 4.00               | 0.20 | 4.35               | 0.33 | 4.2X10 <sup>-9</sup>        |
| 207016_s_at | <i>ALDH1A2</i>  | 7.79               | 0.35 | 8.23               | 0.36 | 5.4X10 <sup>-9</sup>        |
| 203637_s_at | <i>MID1</i>     | 6.64               | 0.32 | 7.02               | 0.29 | 7.3X10 <sup>-9</sup>        |
| 204099_at   | <i>SMARCD3</i>  | 8.16               | 0.30 | 8.55               | 0.32 | 7.4X10 <sup>-9</sup>        |
| 209291_at   | <i>ID4</i>      | 6.44               | 0.51 | 7.08               | 0.53 | 7.7X10 <sup>-9</sup>        |
| 202949_s_at | <i>FHL2</i>     | 9.28               | 0.70 | 10.05              | 0.54 | 8.1X10 <sup>-9</sup>        |

## Supplement – Gene Expression and Genetic Variation in Human Atria

|             |                 |      |      |      |      |                      |
|-------------|-----------------|------|------|------|------|----------------------|
| 201042_at   | <i>TGM2</i>     | 8.87 | 0.23 | 9.16 | 0.25 | 1.3X10 <sup>-8</sup> |
| 1007_s_at   | <i>DDR1</i>     | 7.75 | 0.15 | 7.98 | 0.22 | 1.6X10 <sup>-8</sup> |
| 213135_at   | <i>TIAM1</i>    | 5.32 | 0.35 | 5.74 | 0.36 | 1.8X10 <sup>-8</sup> |
| 201313_at   | <i>ENO2</i>     | 6.45 | 0.26 | 6.79 | 0.30 | 1.8X10 <sup>-8</sup> |
| 210036_s_at | <i>KCNH2</i>    | 8.44 | 0.26 | 8.73 | 0.22 | 2.1X10 <sup>-8</sup> |
| 210095_s_at | <i>IGFBP3</i>   | 8.86 | 0.52 | 9.46 | 0.48 | 2.3X10 <sup>-8</sup> |
| 222020_s_at | <i>NTM</i>      | 4.94 | 0.19 | 5.24 | 0.30 | 2.9X10 <sup>-8</sup> |
| 213974_at   | <i>ADAMTSL3</i> | 6.41 | 0.34 | 6.82 | 0.37 | 4.9X10 <sup>-8</sup> |
| 204931_at   | <i>TCF21</i>    | 5.95 | 0.31 | 6.34 | 0.37 | 5.4X10 <sup>-8</sup> |
| 212775_at   | <i>OBSL1</i>    | 6.52 | 0.34 | 6.93 | 0.37 | 5.7X10 <sup>-8</sup> |
| 209292_at   | <i>ID4</i>      | 4.28 | 0.38 | 4.77 | 0.47 | 8.1X10 <sup>-8</sup> |
| 209409_at   | <i>GRB10</i>    | 8.25 | 0.35 | 8.60 | 0.27 | 8.1X10 <sup>-8</sup> |
| 203813_s_at | <i>SLIT3</i>    | 7.37 | 0.35 | 7.74 | 0.30 | 1.1X10 <sup>-7</sup> |
| 203636_at   | <i>MID1</i>     | 6.96 | 0.23 | 7.23 | 0.25 | 1.1X10 <sup>-7</sup> |
| 203619_s_at | <i>FAIM2</i>    | 6.06 | 0.34 | 6.47 | 0.39 | 1.2X10 <sup>-7</sup> |
| 203886_s_at | <i>FBLN2</i>    | 7.89 | 0.35 | 8.25 | 0.31 | 1.6X10 <sup>-7</sup> |
| 207220_at   | <i>ART4</i>     | 6.00 | 0.19 | 6.19 | 0.17 | 1.6X10 <sup>-7</sup> |
| 219985_at   | <i>HS3ST3A1</i> | 3.99 | 0.16 | 4.21 | 0.24 | 2.2X10 <sup>-7</sup> |
| 212922_s_at | <i>SMYD2</i>    | 7.97 | 0.66 | 8.63 | 0.54 | 2.2X10 <sup>-7</sup> |
| 203088_at   | <i>FBLN5</i>    | 9.18 | 0.27 | 9.48 | 0.29 | 2.5X10 <sup>-7</sup> |
| 214928_at   | <i>OBSL1</i>    | 7.28 | 0.26 | 7.61 | 0.35 | 2.5X10 <sup>-7</sup> |
| 201952_at   | <i>ALCAM</i>    | 6.61 | 0.32 | 7.04 | 0.46 | 3.0X10 <sup>-7</sup> |
| 205990_s_at | <i>WNT5A</i>    | 4.87 | 0.14 | 5.05 | 0.19 | 3.3X10 <sup>-7</sup> |
| 205792_at   | <i>WISP2</i>    | 7.19 | 0.41 | 7.63 | 0.41 | 3.6X10 <sup>-7</sup> |
| 209167_at   | <i>GPM6B</i>    | 6.79 | 0.42 | 7.26 | 0.46 | 4.1X10 <sup>-7</sup> |
| 215813_s_at | <i>PTGS1</i>    | 6.47 | 0.30 | 6.77 | 0.29 | 5.2X10 <sup>-7</sup> |



## Supplement – Gene Expression and Genetic Variation in Human Atria

|             |                |       |      |       |      |                      |
|-------------|----------------|-------|------|-------|------|----------------------|
| 209469_at   | <i>GPM6A</i>   | 4.19  | 0.13 | 4.34  | 0.16 | 5.3X10 <sup>-7</sup> |
| 205127_at   | <i>PTGS1</i>   | 6.16  | 0.21 | 6.38  | 0.21 | 5.3X10 <sup>-7</sup> |
| 205984_at   | <i>CRHBP</i>   | 5.92  | 0.23 | 6.20  | 0.29 | 5.7X10 <sup>-7</sup> |
| 206898_at   | <i>CDH19</i>   | 7.49  | 0.45 | 7.95  | 0.46 | 6.5X10 <sup>-7</sup> |
| 212143_s_at | <i>IGFBP3</i>  | 8.33  | 0.49 | 8.85  | 0.52 | 6.7X10 <sup>-7</sup> |
| 59375_at    | <i>MYO15B</i>  | 6.56  | 0.15 | 6.72  | 0.17 | 7.4X10 <sup>-7</sup> |
| 209170_s_at | <i>GPM6B</i>   | 5.86  | 0.34 | 6.27  | 0.45 | 7.7X10 <sup>-7</sup> |
| 203425_s_at | <i>IGFBP5</i>  | 6.52  | 0.26 | 6.80  | 0.29 | 7.7X10 <sup>-7</sup> |
| 206464_at   | <i>BMX</i>     | 6.32  | 0.31 | 6.62  | 0.26 | 8.5X10 <sup>-7</sup> |
| 218162_at   | <i>OLFML3</i>  | 8.00  | 0.28 | 8.27  | 0.24 | 1.0X10 <sup>-6</sup> |
| 200696_s_at | <i>GSN</i>     | 11.60 | 0.23 | 11.84 | 0.24 | 1.0X10 <sup>-6</sup> |
| 201005_at   | <i>CD9</i>     | 9.07  | 0.35 | 9.39  | 0.29 | 1.2X10 <sup>-6</sup> |
| 207480_s_at | <i>MEIS2</i>   | 5.66  | 0.30 | 6.00  | 0.36 | 1.3X10 <sup>-6</sup> |
| 205934_at   | <i>PLCL1</i>   | 5.63  | 0.38 | 5.99  | 0.34 | 1.4X10 <sup>-6</sup> |
| 207695_s_at | <i>IGSF1</i>   | 5.28  | 0.32 | 5.62  | 0.36 | 1.4X10 <sup>-6</sup> |
| 206070_s_at | <i>EPHA3</i>   | 5.03  | 0.32 | 5.36  | 0.35 | 1.5X10 <sup>-6</sup> |
| 213058_at   | <i>TTC28</i>   | 6.56  | 0.16 | 6.72  | 0.15 | 1.6X10 <sup>-6</sup> |
| 213800_at   | <i>CFH</i>     | 8.42  | 0.55 | 8.96  | 0.53 | 1.8X10 <sup>-6</sup> |
| 211276_at   | <i>TCEAL2</i>  | 4.82  | 0.48 | 5.42  | 0.70 | 2.0X10 <sup>-6</sup> |
| 216836_s_at | <i>ERBB2</i>   | 8.06  | 0.23 | 8.30  | 0.27 | 2.3X10 <sup>-6</sup> |
| 204451_at   | <i>FZD1</i>    | 6.78  | 0.26 | 7.04  | 0.28 | 2.3X10 <sup>-6</sup> |
| 205200_at   | <i>CLEC3B</i>  | 8.29  | 0.62 | 8.83  | 0.47 | 2.4X10 <sup>-6</sup> |
| 206481_s_at | <i>LDB2</i>    | 8.10  | 0.36 | 8.41  | 0.28 | 2.5X10 <sup>-6</sup> |
| 205594_at   | <i>ZNF652</i>  | 3.71  | 0.14 | 3.87  | 0.18 | 2.8X10 <sup>-6</sup> |
| 220415_at   | <i>TNNI3K</i>  | 8.16  | 0.67 | 8.71  | 0.41 | 2.9X10 <sup>-6</sup> |
| 204345_at   | <i>COL16A1</i> | 6.22  | 0.24 | 6.48  | 0.29 | 2.9X10 <sup>-6</sup> |

## Supplement – Gene Expression and Genetic Variation in Human Atria

---

|             |             |      |      |      |      |                      |
|-------------|-------------|------|------|------|------|----------------------|
| 207826_s_at | <i>ID3</i>  | 7.23 | 0.33 | 7.52 | 0.28 | $3.3 \times 10^{-6}$ |
| 204396_s_at | <i>GRK5</i> | 7.27 | 0.33 | 7.58 | 0.33 | $3.3 \times 10^{-6}$ |

---

## Supplement – Gene Expression and Genetic Variation in Human Atria

**Supplemental Table 2.** Comparison with top 20 differentially expressed genes reported in the previous study by Hsu, et al.<sup>1</sup> Nine of eleven genes available in the current study replicated ( $P \leq 0.05$ ).

| Gene ID             | Hsu, et al. <sup>1</sup> |                       | Current Study         |                       | Consistency* |
|---------------------|--------------------------|-----------------------|-----------------------|-----------------------|--------------|
|                     | <i>P</i> value           | Over Expressed Atrium | <i>P</i> value        | Over Expressed Atrium |              |
| <i>HAMP</i>         | $1.6 \times 10^{-111}$   | Right                 | $4.0 \times 10^{-17}$ | Right                 | √            |
| <i>BMP10</i>        | $1.4 \times 10^{-96}$    | Right                 | $4.3 \times 10^{-12}$ | Right                 | √            |
| <i>PITX2</i>        | $8.7 \times 10^{-72}$    | Left                  | $1.7 \times 10^{-11}$ | Left                  | √            |
| <i>C2orf14</i>      | $1.2 \times 10^{-48}$    | Right                 |                       |                       |              |
| <i>C19orf33</i>     | $2.7 \times 10^{-39}$    | Left                  |                       |                       |              |
| <i>LOC100144602</i> | $1.3 \times 10^{-33}$    | Left                  |                       |                       |              |
| <i>MYL2</i>         | $5.1 \times 10^{-33}$    | Left                  | $2.8 \times 10^{-3}$  | Left                  | √            |
| <i>BDKRB1</i>       | $1.1 \times 10^{-31}$    | Left                  |                       |                       |              |
| <i>SALL1</i>        | $6.5 \times 10^{-31}$    | Right                 | $2.3 \times 10^{-1}$  | Right                 | ×            |
| <i>DNASE1L3</i>     | $8.3 \times 10^{-31}$    | Right                 | $1.5 \times 10^{-10}$ | Right                 | √            |
| <i>KRT7</i>         | $1.5 \times 10^{-30}$    | Left                  | $1.3 \times 10^{-1}$  | Left                  | ×            |
| <i>FAM84A</i>       | $5.7 \times 10^{-30}$    | Right                 |                       |                       |              |
| <i>IRX3</i>         | $3.8 \times 10^{-29}$    | Right                 |                       |                       |              |
| <i>THBS4</i>        | $2.6 \times 10^{-27}$    | Left                  | $9.4 \times 10^{-12}$ | Left                  | √            |
| <i>ANKRD30BL</i>    | $2.0 \times 10^{-26}$    | Left                  |                       |                       |              |
| <i>SYT4</i>         | $2.1 \times 10^{-26}$    | Left                  |                       |                       |              |
| <i>ALOX15</i>       | $2.1 \times 10^{-26}$    | Left                  |                       |                       |              |
| <i>CLDN18</i>       | $5.2 \times 10^{-26}$    | Left                  | $5.1 \times 10^{-5}$  | Left                  | √            |
| <i>RBP4</i>         | $1.1 \times 10^{-24}$    | Left                  | $6.6 \times 10^{-3}$  | Left                  | √            |
| <i>HCN4</i>         | $1.3 \times 10^{-24}$    | Right                 | $2.4 \times 10^{-2}$  | Right                 | √            |

\*Indication of consistency: √ - The gene was also significant in the current study ( $P \leq 0.05$ ); × - The gene was not significant in the current study ( $P > 0.05$ )

## Supplement – Gene Expression and Genetic Variation in Human Atria

Supplemental Table 3a. Top cis-associations in LA

| Gene ID     | Gene            | SNP_ID     | Chr   | Position    | Estimate | SD   | P value               | Reported* |
|-------------|-----------------|------------|-------|-------------|----------|------|-----------------------|-----------|
| 210910_s_at | <i>POMZP3</i>   | rs2110465  | chr7  | 76,137,284  | 0.55     | 0.06 | 2.2x10 <sup>-13</sup> | ✓         |
| 217753_s_at | <i>RPS26</i>    | rs11171739 | chr12 | 56,470,625  | 0.59     | 0.06 | 5.5x10 <sup>-13</sup> | ✓         |
| 201141_at   | <i>GPNMB</i>    | rs6952947  | chr7  | 23,121,042  | -0.40    | 0.05 | 2.8x10 <sup>-11</sup> | ✓         |
| 201141_at   | <i>GPNMB</i>    | rs1728292  | chr7  | 23,263,474  | -0.39    | 0.05 | 1.9x10 <sup>-10</sup> | ✓         |
| 201141_at   | <i>GPNMB</i>    | rs1468592  | chr7  | 23,140,647  | -0.38    | 0.05 | 3.9x10 <sup>-10</sup> | ✓         |
| 201141_at   | <i>GPNMB</i>    | rs6461693  | chr7  | 23,160,133  | -0.38    | 0.05 | 3.9x10 <sup>-10</sup> | ✓         |
| 210305_at   | <i>PDE4DIP</i>  | rs12124527 | chr1  | 144,896,319 | -0.48    | 0.06 | 5.8x10 <sup>-10</sup> |           |
| 205197_s_at | <i>ATP7A</i>    | rs2092621  | chrX  | 77,340,216  | 0.21     | 0.03 | 6.8x10 <sup>-10</sup> |           |
| 201141_at   | <i>GPNMB</i>    | rs7341483  | chr7  | 23,127,657  | -0.39    | 0.05 | 6.9x10 <sup>-10</sup> | ✓         |
| 201141_at   | <i>GPNMB</i>    | rs10255155 | chr7  | 23,402,147  | -0.37    | 0.05 | 7.1x10 <sup>-10</sup> | ✓         |
| 217753_s_at | <i>RPS26</i>    | rs7312770  | chr12 | 56,467,587  | 0.52     | 0.07 | 8.9x10 <sup>-10</sup> | ✓         |
| 205048_s_at | <i>PSPH</i>     | rs11238381 | chr7  | 55,891,901  | 1.24     | 0.17 | 9.7x10 <sup>-10</sup> |           |
| 205197_s_at | <i>ATP7A</i>    | rs320992   | chrX  | 77,532,103  | 0.21     | 0.03 | 1.0x10 <sup>-9</sup>  |           |
| 205197_s_at | <i>ATP7A</i>    | rs5913634  | chrX  | 77,325,118  | 0.21     | 0.03 | 1.0x10 <sup>-9</sup>  |           |
| 201141_at   | <i>GPNMB</i>    | rs1624451  | chr7  | 23,262,435  | -0.39    | 0.05 | 1.2x10 <sup>-9</sup>  | ✓         |
| 201141_at   | <i>GPNMB</i>    | rs1881201  | chr7  | 23,194,013  | -0.39    | 0.05 | 1.3x10 <sup>-9</sup>  | ✓         |
| 201141_at   | <i>GPNMB</i>    | rs156425   | chr7  | 23,309,119  | -0.37    | 0.05 | 1.3x10 <sup>-9</sup>  | ✓         |
| 205197_s_at | <i>ATP7A</i>    | rs17139585 | chrX  | 77,360,724  | 0.21     | 0.03 | 1.4x10 <sup>-9</sup>  |           |
| 205197_s_at | <i>ATP7A</i>    | rs5913664  | chrX  | 77,512,840  | 0.21     | 0.03 | 1.4x10 <sup>-9</sup>  |           |
| 205197_s_at | <i>ATP7A</i>    | rs4826248  | chrX  | 77,372,275  | 0.21     | 0.03 | 1.4x10 <sup>-9</sup>  |           |
| 219629_at   | <i>FAM118A</i>  | rs1569413  | chr22 | 45,756,081  | 0.40     | 0.05 | 1.4x10 <sup>-9</sup>  | ✓         |
| 219629_at   | <i>FAM118A</i>  | rs3827393  | chr22 | 45,736,153  | 0.40     | 0.05 | 1.4x10 <sup>-9</sup>  | ✓         |
| 219629_at   | <i>FAM118A</i>  | rs6006992  | chr22 | 45,742,760  | 0.40     | 0.05 | 1.4x10 <sup>-9</sup>  | ✓         |
| 219629_at   | <i>FAM118A</i>  | rs5765272  | chr22 | 45,747,901  | 0.40     | 0.05 | 1.4x10 <sup>-9</sup>  | ✓         |
| 219629_at   | <i>FAM118A</i>  | rs5765327  | chr22 | 45,800,926  | 0.40     | 0.05 | 1.4x10 <sup>-9</sup>  | ✓         |
| 201141_at   | <i>GPNMB</i>    | rs433395   | chr7  | 23,401,955  | -0.35    | 0.05 | 1.6x10 <sup>-9</sup>  | ✓         |
| 205197_s_at | <i>ATP7A</i>    | rs17139617 | chrX  | 77,274,859  | 0.21     | 0.03 | 1.8x10 <sup>-9</sup>  |           |
| 205197_s_at | <i>ATP7A</i>    | rs17139569 | chrX  | 77,422,268  | 0.21     | 0.03 | 1.8x10 <sup>-9</sup>  |           |
| 219629_at   | <i>FAM118A</i>  | rs136610   | chr22 | 45,794,212  | 0.40     | 0.05 | 1.8x10 <sup>-9</sup>  |           |
| 209316_s_at | <i>HBS1L</i>    | rs4896128  | chr6  | 135,349,756 | -0.36    | 0.05 | 2.1x10 <sup>-9</sup>  | ✓         |
| 209316_s_at | <i>HBS1L</i>    | rs6923512  | chr6  | 135,335,268 | -0.36    | 0.05 | 2.1x10 <sup>-9</sup>  | ✓         |
| 209316_s_at | <i>HBS1L</i>    | rs4289677  | chr6  | 135,275,485 | -0.36    | 0.05 | 2.1x10 <sup>-9</sup>  | ✓         |
| 209316_s_at | <i>HBS1L</i>    | rs4896118  | chr6  | 135,276,065 | -0.36    | 0.05 | 2.1x10 <sup>-9</sup>  | ✓         |
| 217753_s_at | <i>RPS26</i>    | rs705698   | chr12 | 56,384,687  | 0.52     | 0.07 | 2.4x10 <sup>-9</sup>  | ✓         |
| 206029_at   | <i>ANKRD1</i>   | rs4933620  | chr10 | 92,659,865  | 1.10     | 0.15 | 2.5x10 <sup>-9</sup>  |           |
| 209480_at   | <i>HLA-DQB1</i> | rs9272346  | chr6  | 32,604,372  | 0.39     | 0.05 | 3.0x10 <sup>-9</sup>  | ✓         |
| 206029_at   | <i>ANKRD1</i>   | rs7089533  | chr10 | 92,605,364  | 1.12     | 0.16 | 3.0x10 <sup>-9</sup>  |           |
| 201141_at   | <i>GPNMB</i>    | rs199355   | chr7  | 23,296,533  | -0.43    | 0.06 | 3.2x10 <sup>-9</sup>  | ✓         |
| 205197_s_at | <i>ATP7A</i>    | rs5959985  | chrX  | 77,502,906  | 0.21     | 0.03 | 3.5x10 <sup>-9</sup>  |           |
| 209788_s_at | <i>ERAP1</i>    | rs17401719 | chr5  | 96,089,046  | -0.21    | 0.03 | 3.8x10 <sup>-9</sup>  | ✓         |
| 209788_s_at | <i>ERAP1</i>    | rs10037212 | chr5  | 96,084,776  | -0.21    | 0.03 | 3.8x10 <sup>-9</sup>  |           |
| 209788_s_at | <i>ERAP1</i>    | rs1862609  | chr5  | 96,086,690  | -0.21    | 0.03 | 3.8x10 <sup>-9</sup>  |           |

## Supplement – Gene Expression and Genetic Variation in Human Atria

|             |                 |            |       |             |       |      |                      |   |
|-------------|-----------------|------------|-------|-------------|-------|------|----------------------|---|
| 219509_at   | <i>MYOZ1</i>    | rs3740293  | chr10 | 75,406,141  | 0.73  | 0.10 | 4.0x10 <sup>-9</sup> |   |
| 205197_s_at | <i>ATP7A</i>    | rs5912576  | chrX  | 77,513,603  | 0.21  | 0.03 | 4.9x10 <sup>-9</sup> |   |
| 205197_s_at | <i>ATP7A</i>    | rs320988   | chrX  | 77,534,962  | 0.21  | 0.03 | 5.0x10 <sup>-9</sup> |   |
| 205197_s_at | <i>ATP7A</i>    | rs2073178  | chrX  | 77,381,014  | 0.21  | 0.03 | 5.0x10 <sup>-9</sup> |   |
| 201141_at   | <i>GPNMB</i>    | rs156429   | chr7  | 23,306,020  | -0.37 | 0.05 | 5.9x10 <sup>-9</sup> | √ |
| 205197_s_at | <i>ATP7A</i>    | rs320990   | chrX  | 77,533,502  | 0.20  | 0.03 | 5.9x10 <sup>-9</sup> |   |
| 213831_at   | <i>HLA-DQA1</i> | rs9272346  | chr6  | 32,604,372  | 0.80  | 0.11 | 5.9x10 <sup>-9</sup> | √ |
| 218505_at   | <i>WDR59</i>    | rs8043624  | chr16 | 74,967,819  | 0.40  | 0.06 | 6.2x10 <sup>-9</sup> |   |
| 218505_at   | <i>WDR59</i>    | rs9937106  | chr16 | 74,966,742  | 0.40  | 0.06 | 6.2x10 <sup>-9</sup> |   |
| 210790_s_at | <i>SAR1A</i>    | rs1046747  | chr10 | 71,910,630  | 0.31  | 0.04 | 6.4x10 <sup>-9</sup> |   |
| 201141_at   | <i>GPNMB</i>    | rs5850     | chr7  | 23,314,547  | -0.36 | 0.05 | 6.5x10 <sup>-9</sup> | √ |
| 205176_s_at | <i>ITGB3BP</i>  | rs855325   | chr1  | 64,064,780  | 0.30  | 0.04 | 6.9x10 <sup>-9</sup> | √ |
| 205176_s_at | <i>ITGB3BP</i>  | rs10789138 | chr1  | 63,859,046  | 0.30  | 0.04 | 6.9x10 <sup>-9</sup> |   |
| 219629_at   | <i>FAM118A</i>  | rs104664   | chr22 | 45,711,854  | 0.42  | 0.06 | 7.1x10 <sup>-9</sup> | √ |
| 203411_s_at | <i>LMNA</i>     | rs16837622 | chr1  | 156,695,504 | -0.55 | 0.08 | 7.6x10 <sup>-9</sup> |   |
| 205197_s_at | <i>ATP7A</i>    | rs3922593  | chrX  | 77,468,792  | 0.21  | 0.03 | 7.7x10 <sup>-9</sup> |   |
| 211200_s_at | <i>EFCAB2</i>   | rs11580510 | chr1  | 245,205,876 | 0.28  | 0.04 | 8.1x10 <sup>-9</sup> | √ |
| 205176_s_at | <i>ITGB3BP</i>  | rs855316   | chr1  | 64,069,495  | 0.30  | 0.04 | 8.2x10 <sup>-9</sup> | √ |
| 205197_s_at | <i>ATP7A</i>    | rs7881148  | chrX  | 77,455,168  | 0.20  | 0.03 | 8.8x10 <sup>-9</sup> |   |
| 205197_s_at | <i>ATP7A</i>    | rs167674   | chrX  | 77,535,996  | 0.20  | 0.03 | 8.8x10 <sup>-9</sup> |   |
| 205197_s_at | <i>ATP7A</i>    | rs321074   | chrX  | 77,541,469  | 0.20  | 0.03 | 8.8x10 <sup>-9</sup> |   |
| 217753_s_at | <i>RPS26</i>    | rs705702   | chr12 | 56,390,636  | 0.50  | 0.07 | 8.9x10 <sup>-9</sup> | √ |
| 205197_s_at | <i>ATP7A</i>    | rs10991    | chrX  | 77,385,748  | 0.21  | 0.03 | 1.2x10 <sup>-8</sup> |   |
| 205197_s_at | <i>ATP7A</i>    | rs1600069  | chrX  | 77,708,727  | 0.20  | 0.03 | 1.6x10 <sup>-8</sup> |   |
| 201141_at   | <i>GPNMB</i>    | rs200717   | chr7  | 23,392,271  | -0.35 | 0.05 | 1.7x10 <sup>-8</sup> | √ |
| 201141_at   | <i>GPNMB</i>    | rs870476   | chr7  | 23,193,271  | -0.42 | 0.06 | 1.8x10 <sup>-8</sup> | √ |
| 218496_at   | <i>RNASEH1</i>  | rs17463250 | chr2  | 3,924,349   | -0.38 | 0.06 | 2.0x10 <sup>-8</sup> |   |
| 220182_at   | <i>SLC25A23</i> | rs173229   | chr19 | 6,452,305   | -0.23 | 0.03 | 2.1x10 <sup>-8</sup> |   |
| 218747_s_at | <i>TAPBPL</i>   | rs2243977  | chr12 | 6,569,983   | 0.26  | 0.04 | 2.1x10 <sup>-8</sup> | √ |
| 201577_at   | <i>NME1</i>     | rs16949649 | chr17 | 49,230,308  | 0.28  | 0.04 | 2.3x10 <sup>-8</sup> | √ |
| 218747_s_at | <i>TAPBPL</i>   | rs2244083  | chr12 | 6,570,539   | 0.25  | 0.04 | 2.4x10 <sup>-8</sup> | √ |
| 201141_at   | <i>GPNMB</i>    | rs4140959  | chr7  | 23,170,776  | -0.37 | 0.06 | 2.4x10 <sup>-8</sup> | √ |
| 209480_at   | <i>HLA-DQB1</i> | rs9272723  | chr6  | 32,609,427  | 0.34  | 0.05 | 3.4x10 <sup>-8</sup> |   |
| 207974_s_at | <i>SKP1</i>     | rs1109309  | chr5  | 133,079,344 | 0.23  | 0.04 | 3.5x10 <sup>-8</sup> |   |
| 210790_s_at | <i>SAR1A</i>    | rs6480442  | chr10 | 71,900,246  | 0.32  | 0.05 | 4.4x10 <sup>-8</sup> |   |
| 201141_at   | <i>GPNMB</i>    | rs6956974  | chr7  | 23,252,318  | -0.38 | 0.06 | 4.6x10 <sup>-8</sup> | √ |
| 201141_at   | <i>GPNMB</i>    | rs6961109  | chr7  | 23,252,413  | -0.38 | 0.06 | 4.6x10 <sup>-8</sup> | √ |
| 205197_s_at | <i>ATP7A</i>    | rs2227291  | chrX  | 77,268,502  | 0.21  | 0.03 | 4.7x10 <sup>-8</sup> |   |
| 203815_at   | <i>GSTT1</i>    | rs4822458  | chr22 | 24,265,659  | 0.68  | 0.11 | 4.9x10 <sup>-8</sup> | √ |
| 219269_at   | <i>HMBOX1</i>   | rs2279442  | chr8  | 28,913,888  | -0.26 | 0.04 | 5.6x10 <sup>-8</sup> |   |
| 213160_at   | <i>DOCK2</i>    | rs4867947  | chr5  | 169,629,403 | 0.36  | 0.06 | 6.0x10 <sup>-8</sup> |   |
| 201141_at   | <i>GPNMB</i>    | rs7805206  | chr7  | 23,160,210  | -0.36 | 0.06 | 6.5x10 <sup>-8</sup> | √ |
| 205197_s_at | <i>ATP7A</i>    | rs5959980  | chrX  | 77,454,133  | 0.18  | 0.03 | 7.2x10 <sup>-8</sup> |   |
| 218948_at   | <i>QRSL1</i>    | rs11153019 | chr6  | 107,090,614 | -0.21 | 0.03 | 8.2x10 <sup>-8</sup> | √ |
| 205176_s_at | <i>ITGB3BP</i>  | rs17391823 | chr1  | 63,986,865  | 0.35  | 0.06 | 8.6x10 <sup>-8</sup> | √ |

## Supplement – Gene Expression and Genetic Variation in Human Atria

|             |                 |            |       |             |       |      |                      |   |
|-------------|-----------------|------------|-------|-------------|-------|------|----------------------|---|
| 205197_s_at | <i>ATP7A</i>    | rs5913656  | chrX  | 77,471,090  | 0.18  | 0.03 | 9.3x10 <sup>-8</sup> |   |
| 209316_s_at | <i>HBS1L</i>    | rs6569982  | chr6  | 135,256,495 | -0.33 | 0.05 | 1.1x10 <sup>-7</sup> |   |
| 208641_s_at | <i>RAC1</i>     | rs2689420  | chr7  | 6,410,321   | 0.30  | 0.05 | 1.1x10 <sup>-7</sup> |   |
| 203374_s_at | <i>TPP2</i>     | rs1887355  | chr13 | 103,235,169 | 0.21  | 0.03 | 1.1x10 <sup>-7</sup> |   |
| 219759_at   | <i>ERAP2</i>    | rs2549794  | chr5  | 96,244,549  | 0.27  | 0.04 | 1.2x10 <sup>-7</sup> | √ |
| 219759_at   | <i>ERAP2</i>    | rs27307    | chr5  | 96,338,505  | 0.27  | 0.04 | 1.2x10 <sup>-7</sup> | √ |
| 218327_s_at | <i>SNAP29</i>   | rs5751939  | chr22 | 21,139,242  | 0.29  | 0.05 | 1.2x10 <sup>-7</sup> | √ |
| 208727_s_at | <i>CDC42</i>    | rs7412010  | chr1  | 22,436,446  | 0.77  | 0.13 | 1.2x10 <sup>-7</sup> |   |
| 219759_at   | <i>ERAP2</i>    | rs27712    | chr5  | 96,364,063  | 0.28  | 0.05 | 1.2x10 <sup>-7</sup> | √ |
| 218496_at   | <i>RNASEH1</i>  | rs985858   | chr2  | 3,921,722   | -0.35 | 0.06 | 1.3x10 <sup>-7</sup> |   |
| 205197_s_at | <i>ATP7A</i>    | rs321014   | chrX  | 77,620,061  | 0.18  | 0.03 | 1.3x10 <sup>-7</sup> |   |
| 212494_at   | <i>TENC1</i>    | rs6580907  | chr12 | 53,169,676  | -0.40 | 0.06 | 1.4x10 <sup>-7</sup> |   |
| 219759_at   | <i>ERAP2</i>    | rs27300    | chr5  | 96,363,407  | 0.27  | 0.04 | 1.4x10 <sup>-7</sup> | √ |
| 201141_at   | <i>GPNMB</i>    | rs7796541  | chr7  | 23,389,073  | -0.37 | 0.06 | 1.6x10 <sup>-7</sup> | √ |
| 205439_at   | <i>GSTT2</i>    | rs17004049 | chr22 | 24,241,594  | 0.41  | 0.07 | 1.7x10 <sup>-7</sup> |   |
| 205197_s_at | <i>ATP7A</i>    | rs320999   | chrX  | 77,576,690  | 0.18  | 0.03 | 1.8x10 <sup>-7</sup> |   |
| 219759_at   | <i>ERAP2</i>    | rs7736466  | chr5  | 96,289,711  | 0.26  | 0.04 | 1.8x10 <sup>-7</sup> | √ |
| 205197_s_at | <i>ATP7A</i>    | rs5913717  | chrX  | 77,700,678  | 0.18  | 0.03 | 1.9x10 <sup>-7</sup> |   |
| 218948_at   | <i>QRSL1</i>    | rs1026619  | chr6  | 107,114,361 | -0.22 | 0.04 | 1.9x10 <sup>-7</sup> | √ |
| 205176_s_at | <i>ITGB3BP</i>  | rs217483   | chr1  | 64,017,830  | 0.29  | 0.05 | 2.0x10 <sup>-7</sup> |   |
| 208727_s_at | <i>CDC42</i>    | rs2268177  | chr1  | 22,415,410  | 0.75  | 0.12 | 2.1x10 <sup>-7</sup> |   |
| 211200_s_at | <i>EFCAB2</i>   | rs10927361 | chr1  | 245,140,654 | 0.27  | 0.04 | 2.2x10 <sup>-7</sup> | √ |
| 209788_s_at | <i>ERAP1</i>    | rs731827   | chr5  | 96,087,015  | -0.23 | 0.04 | 2.3x10 <sup>-7</sup> | √ |
| 205185_at   | <i>SPINK5</i>   | rs1862446  | chr5  | 147,480,556 | 0.24  | 0.04 | 2.3x10 <sup>-7</sup> |   |
| 205185_at   | <i>SPINK5</i>   | rs1862439  | chr5  | 147,494,931 | 0.24  | 0.04 | 2.3x10 <sup>-7</sup> |   |
| 202070_s_at | <i>IDH3A</i>    | rs8035724  | chr15 | 78,470,542  | 0.27  | 0.05 | 2.4x10 <sup>-7</sup> |   |
| 219759_at   | <i>ERAP2</i>    | rs3909451  | chr5  | 96,295,121  | 0.27  | 0.04 | 2.5x10 <sup>-7</sup> | √ |
| 213831_at   | <i>HLA-DQA1</i> | rs9272723  | chr6  | 32,609,427  | 0.67  | 0.11 | 2.6x10 <sup>-7</sup> | √ |
| 205197_s_at | <i>ATP7A</i>    | rs321028   | chrX  | 77,587,600  | 0.17  | 0.03 | 2.8x10 <sup>-7</sup> |   |
| 205197_s_at | <i>ATP7A</i>    | rs320986   | chrX  | 77,690,251  | 0.17  | 0.03 | 2.8x10 <sup>-7</sup> |   |
| 205197_s_at | <i>ATP7A</i>    | rs321034   | chrX  | 77,635,122  | 0.17  | 0.03 | 2.8x10 <sup>-7</sup> |   |
| 219759_at   | <i>ERAP2</i>    | rs9127     | chr5  | 96,372,165  | 0.27  | 0.04 | 2.9x10 <sup>-7</sup> |   |
| 218347_at   | <i>TYW1</i>     | rs3845174  | chr7  | 66,533,678  | 0.16  | 0.03 | 2.9x10 <sup>-7</sup> |   |
| 203815_at   | <i>GSTT1</i>    | rs5751770  | chr22 | 24,252,842  | -0.61 | 0.10 | 3.0x10 <sup>-7</sup> | √ |
| 205197_s_at | <i>ATP7A</i>    | rs321090   | chrX  | 77,559,987  | 0.18  | 0.03 | 3.2x10 <sup>-7</sup> |   |
| 203815_at   | <i>GSTT1</i>    | rs1129067  | chr22 | 24,228,125  | -0.75 | 0.13 | 3.3x10 <sup>-7</sup> | √ |
| 219759_at   | <i>ERAP2</i>    | rs27993    | chr5  | 96,355,603  | 0.28  | 0.05 | 3.4x10 <sup>-7</sup> |   |
| 203815_at   | <i>GSTT1</i>    | rs1002286  | chr22 | 24,257,337  | 0.65  | 0.11 | 3.5x10 <sup>-7</sup> | √ |
| 202070_s_at | <i>IDH3A</i>    | rs3816253  | chr15 | 78,458,485  | 0.27  | 0.05 | 3.5x10 <sup>-7</sup> |   |
| 202070_s_at | <i>IDH3A</i>    | rs12910386 | chr15 | 78,472,644  | 0.27  | 0.05 | 3.5x10 <sup>-7</sup> |   |
| 203411_s_at | <i>LMNA</i>     | rs3795737  | chr1  | 156,697,056 | -0.47 | 0.08 | 3.6x10 <sup>-7</sup> |   |
| 209316_s_at | <i>HBS1L</i>    | rs728030   | chr6  | 135,246,294 | -0.33 | 0.06 | 3.6x10 <sup>-7</sup> |   |
| 211200_s_at | <i>EFCAB2</i>   | rs6699566  | chr1  | 245,136,331 | 0.23  | 0.04 | 3.7x10 <sup>-7</sup> | √ |
| 208982_at   | <i>PECAM1</i>   | rs1122800  | chr17 | 62,391,365  | -0.42 | 0.07 | 3.7x10 <sup>-7</sup> |   |
| 205197_s_at | <i>ATP7A</i>    | rs5913659  | chrX  | 77,506,965  | 0.18  | 0.03 | 4.1x10 <sup>-7</sup> |   |

## Supplement – Gene Expression and Genetic Variation in Human Atria

|             |                |            |       |             |       |      |                      |   |
|-------------|----------------|------------|-------|-------------|-------|------|----------------------|---|
| 203815_at   | <i>GSTT1</i>   | rs2154594  | chr22 | 24,254,055  | -0.62 | 0.11 | 4.3x10 <sup>-7</sup> | ✓ |
| 203815_at   | <i>GSTT1</i>   | rs140245   | chr22 | 24,329,711  | 0.68  | 0.12 | 4.4x10 <sup>-7</sup> | ✓ |
| 208982_at   | <i>PECAM1</i>  | rs9902260  | chr17 | 62,399,872  | -0.42 | 0.07 | 4.6x10 <sup>-7</sup> |   |
| 203815_at   | <i>GSTT1</i>   | rs2000468  | chr22 | 24,241,611  | 0.63  | 0.11 | 4.8x10 <sup>-7</sup> |   |
| 205197_s_at | <i>ATP7A</i>   | rs5913725  | chrX  | 77,716,546  | 0.17  | 0.03 | 4.8x10 <sup>-7</sup> |   |
| 219759_at   | <i>ERAP2</i>   | rs1974871  | chr5  | 96,226,535  | 0.24  | 0.04 | 5.0x10 <sup>-7</sup> | ✓ |
| 212921_at   | <i>SMYD2</i>   | rs320413   | chr1  | 213,605,355 | 0.42  | 0.07 | 6.0x10 <sup>-7</sup> |   |
| 203815_at   | <i>GSTT1</i>   | rs2186366  | chr22 | 24,254,113  | -0.63 | 0.11 | 6.0x10 <sup>-7</sup> | ✓ |
| 219759_at   | <i>ERAP2</i>   | rs2548533  | chr5  | 96,238,401  | 0.24  | 0.04 | 6.1x10 <sup>-7</sup> | ✓ |
| 219759_at   | <i>ERAP2</i>   | rs2549797  | chr5  | 96,245,518  | 0.24  | 0.04 | 6.1x10 <sup>-7</sup> | ✓ |
| 219759_at   | <i>ERAP2</i>   | rs2910787  | chr5  | 96,274,223  | 0.24  | 0.04 | 6.1x10 <sup>-7</sup> | ✓ |
| 209316_s_at | <i>HBS1L</i>   | rs1547247  | chr6  | 135,390,836 | -0.35 | 0.06 | 6.4x10 <sup>-7</sup> |   |
| 207344_at   | <i>AKAP3</i>   | rs10849105 | chr12 | 4,719,675   | 0.79  | 0.14 | 6.4x10 <sup>-7</sup> |   |
| 203096_s_at | <i>RAPGEF2</i> | rs11732785 | chr4  | 160,312,930 | 0.31  | 0.05 | 6.4x10 <sup>-7</sup> |   |
| 209316_s_at | <i>HBS1L</i>   | rs4472368  | chr6  | 135,274,232 | -0.29 | 0.05 | 6.7x10 <sup>-7</sup> | ✓ |
| 209314_s_at | <i>HBS1L</i>   | rs4896128  | chr6  | 135,349,756 | -0.23 | 0.04 | 6.7x10 <sup>-7</sup> | ✓ |
| 209314_s_at | <i>HBS1L</i>   | rs6923512  | chr6  | 135,335,268 | -0.23 | 0.04 | 6.7x10 <sup>-7</sup> | ✓ |
| 209314_s_at | <i>HBS1L</i>   | rs4289677  | chr6  | 135,275,485 | -0.23 | 0.04 | 6.7x10 <sup>-7</sup> | ✓ |
| 209314_s_at | <i>HBS1L</i>   | rs4896118  | chr6  | 135,276,065 | -0.23 | 0.04 | 6.7x10 <sup>-7</sup> | ✓ |
| 207344_at   | <i>AKAP3</i>   | rs1990316  | chr12 | 4,733,056   | 0.76  | 0.13 | 6.9x10 <sup>-7</sup> |   |
| 208895_s_at | <i>DDX18</i>   | rs13427023 | chr2  | 117,719,892 | -0.92 | 0.16 | 7.1x10 <sup>-7</sup> |   |
| 201922_at   | <i>NSA2</i>    | rs16872345 | chr5  | 74,149,478  | 0.39  | 0.07 | 7.1x10 <sup>-7</sup> |   |
| 212494_at   | <i>TENC1</i>   | rs4564385  | chr12 | 53,133,012  | -0.30 | 0.05 | 7.3x10 <sup>-7</sup> |   |
| 219759_at   | <i>ERAP2</i>   | rs27290    | chr5  | 96,350,088  | 0.24  | 0.04 | 7.6x10 <sup>-7</sup> | ✓ |
| 203815_at   | <i>GSTT1</i>   | rs5760106  | chr22 | 24,250,645  | -0.61 | 0.11 | 8.4x10 <sup>-7</sup> | ✓ |
| 209788_s_at | <i>ERAP1</i>   | rs7705827  | chr5  | 96,082,433  | -0.21 | 0.04 | 8.4x10 <sup>-7</sup> |   |
| 205197_s_at | <i>ATP7A</i>   | rs2284753  | chrX  | 77,371,470  | 0.17  | 0.03 | 8.5x10 <sup>-7</sup> |   |
| 205197_s_at | <i>ATP7A</i>   | rs321013   | chrX  | 77,621,340  | 0.17  | 0.03 | 9.5x10 <sup>-7</sup> |   |
| 205197_s_at | <i>ATP7A</i>   | rs321033   | chrX  | 77,634,947  | 0.17  | 0.03 | 9.5x10 <sup>-7</sup> |   |
| 205197_s_at | <i>ATP7A</i>   | rs599931   | chrX  | 77,660,137  | 0.17  | 0.03 | 9.5x10 <sup>-7</sup> |   |
| 205197_s_at | <i>ATP7A</i>   | rs320985   | chrX  | 77,688,471  | 0.17  | 0.03 | 9.5x10 <sup>-7</sup> |   |
| 205197_s_at | <i>ATP7A</i>   | rs5913716  | chrX  | 77,700,395  | 0.17  | 0.03 | 9.5x10 <sup>-7</sup> |   |
| 212921_at   | <i>SMYD2</i>   | rs320448   | chr1  | 213,618,740 | 0.42  | 0.08 | 9.7x10 <sup>-7</sup> |   |
| 212921_at   | <i>SMYD2</i>   | rs320447   | chr1  | 213,619,065 | 0.42  | 0.08 | 9.7x10 <sup>-7</sup> |   |
| 212921_at   | <i>SMYD2</i>   | rs320441   | chr1  | 213,625,934 | 0.42  | 0.08 | 9.7x10 <sup>-7</sup> |   |
| 205197_s_at | <i>ATP7A</i>   | rs321032   | chrX  | 77,634,925  | 0.17  | 0.03 | 9.8x10 <sup>-7</sup> |   |
| 219027_s_at | <i>MYO9A</i>   | rs7182776  | chr15 | 72,462,831  | 0.16  | 0.03 | 1.0x10 <sup>-6</sup> |   |
| 219759_at   | <i>ERAP2</i>   | rs2278019  | chr5  | 96,225,252  | 0.27  | 0.05 | 1.0x10 <sup>-6</sup> | ✓ |
| 203815_at   | <i>GSTT1</i>   | rs17004811 | chr22 | 24,404,830  | -0.70 | 0.13 | 1.0x10 <sup>-6</sup> | ✓ |
| 221808_at   | <i>RAB9A</i>   | rs11095593 | chrX  | 12,952,580  | 0.19  | 0.03 | 1.0x10 <sup>-6</sup> |   |
| 201577_at   | <i>NME1</i>    | rs2318782  | chr17 | 49,227,606  | 0.27  | 0.05 | 1.0x10 <sup>-6</sup> | ✓ |
| 219509_at   | <i>MYOZ1</i>   | rs9664184  | chr10 | 75,409,967  | 0.59  | 0.11 | 1.1x10 <sup>-6</sup> | ✓ |
| 205185_at   | <i>SPINK5</i>  | rs1423007  | chr5  | 147,442,868 | 0.23  | 0.04 | 1.1x10 <sup>-6</sup> |   |
| 205185_at   | <i>SPINK5</i>  | rs1423001  | chr5  | 147,449,855 | 0.23  | 0.04 | 1.1x10 <sup>-6</sup> |   |
| 219759_at   | <i>ERAP2</i>   | rs1056893  | chr5  | 96,245,439  | 0.24  | 0.04 | 1.1x10 <sup>-6</sup> | ✓ |

## Supplement – Gene Expression and Genetic Variation in Human Atria

|             |               |            |       |             |       |      |                      |   |
|-------------|---------------|------------|-------|-------------|-------|------|----------------------|---|
| 205197_s_at | <i>ATP7A</i>  | rs5913723  | chrX  | 77,710,039  | 0.17  | 0.03 | 1.1x10 <sup>-6</sup> |   |
| 205197_s_at | <i>ATP7A</i>  | rs17313128 | chrX  | 77,748,728  | 0.17  | 0.03 | 1.1x10 <sup>-6</sup> |   |
| 219759_at   | <i>ERAP2</i>  | rs27397    | chr5  | 96,340,616  | 0.25  | 0.05 | 1.1x10 <sup>-6</sup> | √ |
| 205185_at   | <i>SPINK5</i> | rs9325064  | chr5  | 147,448,360 | 0.24  | 0.04 | 1.2x10 <sup>-6</sup> |   |
| 203815_at   | <i>GSTT1</i>  | rs113413   | chr22 | 24,292,264  | -0.78 | 0.14 | 1.2x10 <sup>-6</sup> | √ |
| 205197_s_at | <i>ATP7A</i>  | rs5913740  | chrX  | 77,732,760  | 0.17  | 0.03 | 1.3x10 <sup>-6</sup> |   |
| 205197_s_at | <i>ATP7A</i>  | rs5913718  | chrX  | 77,700,773  | 0.17  | 0.03 | 1.3x10 <sup>-6</sup> |   |
| 205197_s_at | <i>ATP7A</i>  | rs417862   | chrX  | 77,628,865  | 0.17  | 0.03 | 1.3x10 <sup>-6</sup> |   |
| 209316_s_at | <i>HBS1L</i>  | rs4440481  | chr6  | 135,276,696 | -0.29 | 0.05 | 1.3x10 <sup>-6</sup> | √ |
| 219269_at   | <i>HMBOX1</i> | rs10503836 | chr8  | 28,885,470  | 0.24  | 0.04 | 1.3x10 <sup>-6</sup> |   |

\*√ represents that the eQTL has already been reported in other tissues from eQTL Browser

(<http://eqtl.uchicago.edu/Home.html> )



## Supplement – Gene Expression and Genetic Variation in Human Atria

Supplemental Table 3b. Top cis-associations in RA

| Gene ID     | Gene            | SNP ID     | Chr   | Position    | Estimate | Std. Error | P value               | Reported* |
|-------------|-----------------|------------|-------|-------------|----------|------------|-----------------------|-----------|
| 217753_s_at | <i>RPS26</i>    | rs11171739 | chr12 | 56,470,625  | 0.64     | 0.06       | 3.4x10 <sup>-14</sup> | ✓         |
| 219629_at   | <i>FAM118A</i>  | rs3827393  | chr22 | 45,736,153  | 0.54     | 0.05       | 2.2x10 <sup>-13</sup> | ✓         |
| 219629_at   | <i>FAM118A</i>  | rs6006992  | chr22 | 45,742,760  | 0.54     | 0.05       | 2.2x10 <sup>-13</sup> | ✓         |
| 219629_at   | <i>FAM118A</i>  | rs5765272  | chr22 | 45,747,901  | 0.54     | 0.05       | 2.2x10 <sup>-13</sup> | ✓         |
| 219629_at   | <i>FAM118A</i>  | rs1569413  | chr22 | 45,756,081  | 0.54     | 0.05       | 2.2x10 <sup>-13</sup> | ✓         |
| 219629_at   | <i>FAM118A</i>  | rs5765327  | chr22 | 45,800,926  | 0.54     | 0.05       | 2.2x10 <sup>-13</sup> | ✓         |
| 203815_at   | <i>GSTT1</i>    | rs4822458  | chr22 | 24,265,659  | 0.99     | 0.10       | 2.4x10 <sup>-13</sup> | ✓         |
| 219629_at   | <i>FAM118A</i>  | rs136610   | chr22 | 45,794,212  | 0.54     | 0.06       | 4.7x10 <sup>-13</sup> |           |
| 209316_s_at | <i>HBS1L</i>    | rs6923512  | chr6  | 135,335,268 | -0.45    | 0.05       | 4.8x10 <sup>-13</sup> | ✓         |
| 209316_s_at | <i>HBS1L</i>    | rs4896128  | chr6  | 135,349,756 | -0.45    | 0.05       | 4.8x10 <sup>-13</sup> | ✓         |
| 209316_s_at | <i>HBS1L</i>    | rs4289677  | chr6  | 135,275,485 | -0.45    | 0.05       | 4.8x10 <sup>-13</sup> | ✓         |
| 209316_s_at | <i>HBS1L</i>    | rs4896118  | chr6  | 135,276,065 | -0.45    | 0.05       | 4.8x10 <sup>-13</sup> | ✓         |
| 213831_at   | <i>HLA-DQA1</i> | rs9272346  | chr6  | 32,604,372  | 0.89     | 0.10       | 4.5x10 <sup>-12</sup> | ✓         |
| 203815_at   | <i>GSTT1</i>    | rs1002286  | chr22 | 24,257,337  | 0.97     | 0.11       | 5.4x10 <sup>-12</sup> | ✓         |
| 218747_s_at | <i>TAPBPL</i>   | rs2244083  | chr12 | 6,570,539   | 0.33     | 0.04       | 1.1x10 <sup>-11</sup> | ✓         |
| 209316_s_at | <i>HBS1L</i>    | rs6569982  | chr6  | 135,256,495 | -0.44    | 0.05       | 2.0x10 <sup>-11</sup> |           |
| 203815_at   | <i>GSTT1</i>    | rs140245   | chr22 | 24,329,711  | 0.96     | 0.11       | 3.1x10 <sup>-11</sup> | ✓         |
| 219759_at   | <i>ERAP2</i>    | rs2549794  | chr5  | 96,244,549  | 0.36     | 0.04       | 3.1x10 <sup>-11</sup> | ✓         |
| 219759_at   | <i>ERAP2</i>    | rs27307    | chr5  | 96,338,505  | 0.36     | 0.04       | 3.1x10 <sup>-11</sup> | ✓         |
| 208727_s_at | <i>CDC42</i>    | rs2268177  | chr1  | 22,415,410  | 0.69     | 0.08       | 4.8x10 <sup>-11</sup> |           |
| 219759_at   | <i>ERAP2</i>    | rs3909451  | chr5  | 96,295,121  | 0.37     | 0.04       | 4.9x10 <sup>-11</sup> | ✓         |
| 203815_at   | <i>GSTT1</i>    | rs113413   | chr22 | 24,292,264  | -1.05    | 0.12       | 5.2x10 <sup>-11</sup> | ✓         |
| 219759_at   | <i>ERAP2</i>    | rs27712    | chr5  | 96,364,063  | 0.37     | 0.04       | 7.9x10 <sup>-11</sup> | ✓         |
| 218747_s_at | <i>TAPBPL</i>   | rs2243977  | chr12 | 6,569,983   | 0.33     | 0.04       | 1.0x10 <sup>-10</sup> | ✓         |
| 218746_at   | <i>TAPBPL</i>   | rs2243977  | chr12 | 6,569,983   | 0.31     | 0.04       | 1.1x10 <sup>-10</sup> | ✓         |
| 218746_at   | <i>TAPBPL</i>   | rs2244083  | chr12 | 6,570,539   | 0.30     | 0.04       | 1.5x10 <sup>-10</sup> | ✓         |
| 203815_at   | <i>GSTT1</i>    | rs5760176  | chr22 | 24,402,321  | 0.97     | 0.12       | 2.3x10 <sup>-10</sup> | ✓         |
| 203290_at   | <i>HLA-DQA1</i> | rs502771   | chr6  | 32,578,970  | 0.56     | 0.07       | 2.6x10 <sup>-10</sup> | ✓         |
| 206029_at   | <i>ANKRD1</i>   | rs1892110  | chr10 | 92,457,246  | 0.80     | 0.10       | 3.4x10 <sup>-10</sup> |           |
| 203815_at   | <i>GSTT1</i>    | rs2000468  | chr22 | 24,241,611  | 0.93     | 0.12       | 3.5x10 <sup>-10</sup> |           |
| 206918_s_at | <i>CPNE1</i>    | rs6060625  | chr20 | 34,414,318  | -0.37    | 0.05       | 5.7x10 <sup>-10</sup> | ✓         |
| 206918_s_at | <i>CPNE1</i>    | rs6060578  | chr20 | 34,305,445  | -0.37    | 0.05       | 5.7x10 <sup>-10</sup> | ✓         |
| 213831_at   | <i>HLA-DQA1</i> | rs9272723  | chr6  | 32,609,427  | 0.79     | 0.10       | 5.9x10 <sup>-10</sup> | ✓         |
| 218747_s_at | <i>TAPBPL</i>   | rs1043262  | chr12 | 6,639,088   | 0.31     | 0.04       | 7.0x10 <sup>-10</sup> | ✓         |
| 219759_at   | <i>ERAP2</i>    | rs27290    | chr5  | 96,350,088  | 0.37     | 0.05       | 9.0x10 <sup>-10</sup> | ✓         |
| 218747_s_at | <i>TAPBPL</i>   | rs758739   | chr12 | 6,626,369   | 0.32     | 0.04       | 9.1x10 <sup>-10</sup> | ✓         |
| 201445_at   | <i>CNN3</i>     | rs859062   | chr1  | 95,361,793  | -0.54    | 0.07       | 1.1x10 <sup>-9</sup>  |           |
| 219759_at   | <i>ERAP2</i>    | rs1974871  | chr5  | 96,226,535  | 0.32     | 0.04       | 1.1x10 <sup>-9</sup>  | ✓         |
| 219629_at   | <i>FAM118A</i>  | rs104664   | chr22 | 45,711,854  | 0.48     | 0.06       | 1.5x10 <sup>-9</sup>  | ✓         |
| 218747_s_at | <i>TAPBPL</i>   | rs2079867  | chr12 | 6,622,111   | 0.31     | 0.04       | 1.7x10 <sup>-9</sup>  | ✓         |
| 201445_at   | <i>CNN3</i>     | rs859064   | chr1  | 95,352,701  | -0.51    | 0.07       | 1.7x10 <sup>-9</sup>  |           |
| 209316_s_at | <i>HBS1L</i>    | rs4472368  | chr6  | 135,274,232 | -0.38    | 0.05       | 1.9x10 <sup>-9</sup>  | ✓         |

## Supplement – Gene Expression and Genetic Variation in Human Atria

|             |                 |            |       |             |       |      |                      |   |
|-------------|-----------------|------------|-------|-------------|-------|------|----------------------|---|
| 219759_at   | <i>ERAP2</i>    | rs27711    | chr5  | 96,345,739  | 0.36  | 0.05 | 1.9x10 <sup>-9</sup> | ✓ |
| 219759_at   | <i>ERAP2</i>    | rs27300    | chr5  | 96,363,407  | 0.34  | 0.05 | 1.9x10 <sup>-9</sup> | ✓ |
| 218795_at   | <i>ACP6</i>     | rs2275552  | chr1  | 147,131,945 | -0.22 | 0.03 | 2.0x10 <sup>-9</sup> | ✓ |
| 209480_at   | <i>HLA-DQB1</i> | rs9272346  | chr6  | 32,604,372  | 0.38  | 0.05 | 2.2x10 <sup>-9</sup> | ✓ |
| 219759_at   | <i>ERAP2</i>    | rs27993    | chr5  | 96,355,603  | 0.35  | 0.05 | 2.4x10 <sup>-9</sup> |   |
| 210910_s_at | <i>POMZP3</i>   | rs2110465  | chr7  | 76,137,284  | 0.51  | 0.07 | 3.0x10 <sup>-9</sup> | ✓ |
| 217753_s_at | <i>RPS26</i>    | rs7312770  | chr12 | 56,467,587  | 0.57  | 0.08 | 3.0x10 <sup>-9</sup> | ✓ |
| 206029_at   | <i>ANKRD1</i>   | rs12259754 | chr10 | 92,472,510  | 0.81  | 0.11 | 3.1x10 <sup>-9</sup> |   |
| 206029_at   | <i>ANKRD1</i>   | rs11186286 | chr10 | 92,477,076  | 0.81  | 0.11 | 3.1x10 <sup>-9</sup> |   |
| 201123_s_at | <i>EIF5A</i>    | rs4796398  | chr17 | 7,208,197   | 1.16  | 0.16 | 3.2x10 <sup>-9</sup> | ✓ |
| 217753_s_at | <i>RPS26</i>    | rs705698   | chr12 | 56,384,687  | 0.57  | 0.08 | 3.5x10 <sup>-9</sup> | ✓ |
| 217753_s_at | <i>RPS26</i>    | rs705702   | chr12 | 56,390,636  | 0.57  | 0.08 | 3.5x10 <sup>-9</sup> | ✓ |
| 218795_at   | <i>ACP6</i>     | rs6674938  | chr1  | 147,131,465 | -0.22 | 0.03 | 4.3x10 <sup>-9</sup> | ✓ |
| 209316_s_at | <i>HBS1L</i>    | rs4646871  | chr6  | 135,265,617 | -0.40 | 0.05 | 4.4x10 <sup>-9</sup> | ✓ |
| 206029_at   | <i>ANKRD1</i>   | rs7913197  | chr10 | 92,451,763  | 0.85  | 0.12 | 4.7x10 <sup>-9</sup> |   |
| 203815_at   | <i>GSTT1</i>    | rs5760106  | chr22 | 24,250,645  | -0.81 | 0.11 | 4.8x10 <sup>-9</sup> | ✓ |
| 201445_at   | <i>CNN3</i>     | rs859058   | chr1  | 95,367,649  | -0.53 | 0.07 | 5.0x10 <sup>-9</sup> |   |
| 203815_at   | <i>GSTT1</i>    | rs5751770  | chr22 | 24,252,842  | -0.80 | 0.11 | 5.3x10 <sup>-9</sup> | ✓ |
| 218948_at   | <i>QRSL1</i>    | rs11153019 | chr6  | 107,090,614 | -0.26 | 0.04 | 5.3x10 <sup>-9</sup> | ✓ |
| 203290_at   | <i>HLA-DQA1</i> | rs9272535  | chr6  | 32,606,756  | 0.57  | 0.08 | 5.3x10 <sup>-9</sup> | ✓ |
| 203290_at   | <i>HLA-DQA1</i> | rs9272219  | chr6  | 32,602,269  | 0.57  | 0.08 | 5.3x10 <sup>-9</sup> | ✓ |
| 209316_s_at | <i>HBS1L</i>    | rs4440481  | chr6  | 135,276,696 | -0.39 | 0.06 | 5.6x10 <sup>-9</sup> | ✓ |
| 206918_s_at | <i>CPNE1</i>    | rs6120998  | chr20 | 34,187,313  | -0.36 | 0.05 | 6.5x10 <sup>-9</sup> | ✓ |
| 203628_at   | <i>IGF1R</i>    | rs2229765  | chr15 | 99,478,225  | 0.60  | 0.09 | 6.5x10 <sup>-9</sup> |   |
| 206029_at   | <i>ANKRD1</i>   | rs12783703 | chr10 | 92,560,413  | 0.72  | 0.10 | 7.0x10 <sup>-9</sup> |   |
| 206029_at   | <i>ANKRD1</i>   | rs12766851 | chr10 | 92,562,831  | 0.72  | 0.10 | 7.0x10 <sup>-9</sup> |   |
| 206918_s_at | <i>CPNE1</i>    | rs1970357  | chr20 | 34,339,200  | -0.35 | 0.05 | 7.6x10 <sup>-9</sup> | ✓ |
| 202070_s_at | <i>IDH3A</i>    | rs8035724  | chr15 | 78,470,542  | 0.30  | 0.04 | 7.7x10 <sup>-9</sup> |   |
| 218948_at   | <i>QRSL1</i>    | rs1026619  | chr6  | 107,114,361 | -0.27 | 0.04 | 8.3x10 <sup>-9</sup> | ✓ |
| 219759_at   | <i>ERAP2</i>    | rs10434709 | chr5  | 96,225,774  | 0.34  | 0.05 | 1.0x10 <sup>-8</sup> | ✓ |
| 219509_at   | <i>MYOZ1</i>    | rs3740293  | chr10 | 75,406,141  | 0.79  | 0.12 | 1.1x10 <sup>-8</sup> |   |
| 207040_s_at | <i>ST13</i>     | rs5996064  | chr22 | 42,172,080  | -0.29 | 0.04 | 1.1x10 <sup>-8</sup> |   |
| 208727_s_at | <i>CDC42</i>    | rs7412010  | chr1  | 22,436,446  | 0.75  | 0.11 | 1.1x10 <sup>-8</sup> |   |
| 206918_s_at | <i>CPNE1</i>    | rs7271036  | chr20 | 34,467,215  | -0.36 | 0.05 | 1.5x10 <sup>-8</sup> | ✓ |
| 209316_s_at | <i>HBS1L</i>    | rs728030   | chr6  | 135,246,294 | -0.41 | 0.06 | 1.6x10 <sup>-8</sup> |   |
| 209314_s_at | <i>HBS1L</i>    | rs4646871  | chr6  | 135,265,617 | -0.27 | 0.04 | 1.7x10 <sup>-8</sup> | ✓ |
| 202070_s_at | <i>IDH3A</i>    | rs3816253  | chr15 | 78,458,485  | 0.29  | 0.04 | 1.7x10 <sup>-8</sup> |   |
| 219759_at   | <i>ERAP2</i>    | rs2278019  | chr5  | 96,225,252  | 0.38  | 0.06 | 1.8x10 <sup>-8</sup> | ✓ |
| 209314_s_at | <i>HBS1L</i>    | rs6923512  | chr6  | 135,335,268 | -0.26 | 0.04 | 1.9x10 <sup>-8</sup> | ✓ |
| 209314_s_at | <i>HBS1L</i>    | rs4896128  | chr6  | 135,349,756 | -0.26 | 0.04 | 1.9x10 <sup>-8</sup> | ✓ |
| 209314_s_at | <i>HBS1L</i>    | rs4289677  | chr6  | 135,275,485 | -0.26 | 0.04 | 1.9x10 <sup>-8</sup> | ✓ |
| 209314_s_at | <i>HBS1L</i>    | rs4896118  | chr6  | 135,276,065 | -0.26 | 0.04 | 1.9x10 <sup>-8</sup> | ✓ |
| 202070_s_at | <i>IDH3A</i>    | rs12910386 | chr15 | 78,472,644  | 0.29  | 0.04 | 1.9x10 <sup>-8</sup> |   |
| 219759_at   | <i>ERAP2</i>    | rs11135482 | chr5  | 96,221,426  | 0.30  | 0.05 | 1.9x10 <sup>-8</sup> |   |
| 203815_at   | <i>GSTT1</i>    | rs5751761  | chr22 | 24,243,736  | 0.98  | 0.14 | 2.2x10 <sup>-8</sup> | ✓ |

## Supplement – Gene Expression and Genetic Variation in Human Atria

|             |                 |            |       |             |       |      |                      |   |
|-------------|-----------------|------------|-------|-------------|-------|------|----------------------|---|
| 218747_s_at | <i>TAPBPL</i>   | rs2079868  | chr12 | 6,622,346   | 0.30  | 0.05 | 2.5x10 <sup>-8</sup> | ✓ |
| 218055_s_at | <i>WDR41</i>    | rs335628   | chr5  | 76,729,538  | -0.32 | 0.05 | 2.6x10 <sup>-8</sup> | ✓ |
| 203290_at   | <i>HLA-DQA1</i> | rs502055   | chr6  | 32,579,003  | 0.48  | 0.07 | 2.7x10 <sup>-8</sup> |   |
| 205048_s_at | <i>PSPH</i>     | rs11238381 | chr7  | 55,891,901  | 1.01  | 0.15 | 2.7x10 <sup>-8</sup> |   |
| 210305_at   | <i>PDE4DIP</i>  | rs12124527 | chr1  | 144,896,319 | -0.52 | 0.08 | 2.8x10 <sup>-8</sup> |   |
| 204194_at   | <i>BACH1</i>    | rs2832175  | chr21 | 30,475,606  | 0.16  | 0.02 | 2.8x10 <sup>-8</sup> |   |
| 203290_at   | <i>HLA-DQA1</i> | rs615672   | chr6  | 32,574,171  | 0.52  | 0.08 | 2.8x10 <sup>-8</sup> | ✓ |
| 219759_at   | <i>ERAP2</i>    | rs7736466  | chr5  | 96,289,711  | 0.32  | 0.05 | 3.3x10 <sup>-8</sup> | ✓ |
| 219759_at   | <i>ERAP2</i>    | rs2910787  | chr5  | 96,274,223  | 0.31  | 0.05 | 3.4x10 <sup>-8</sup> | ✓ |
| 209480_at   | <i>HLA-DQB1</i> | rs9272723  | chr6  | 32,609,427  | 0.33  | 0.05 | 3.4x10 <sup>-8</sup> |   |
| 203815_at   | <i>GSTT1</i>    | rs2186366  | chr22 | 24,254,113  | -0.81 | 0.12 | 3.8x10 <sup>-8</sup> | ✓ |
| 205048_s_at | <i>PSPH</i>     | rs11238377 | chr7  | 55,776,532  | 1.26  | 0.19 | 4.0x10 <sup>-8</sup> |   |
| 208982_at   | <i>PECAM1</i>   | rs9902260  | chr17 | 62,399,872  | -0.39 | 0.06 | 4.5x10 <sup>-8</sup> |   |
| 203815_at   | <i>GSTT1</i>    | rs2154594  | chr22 | 24,254,055  | -0.78 | 0.12 | 5.1x10 <sup>-8</sup> | ✓ |
| 221562_s_at | <i>SIRT3</i>    | rs4980329  | chr11 | 232,598     | 0.23  | 0.04 | 5.7x10 <sup>-8</sup> |   |
| 219759_at   | <i>ERAP2</i>    | rs13167902 | chr5  | 96,222,020  | 0.31  | 0.05 | 6.0x10 <sup>-8</sup> | ✓ |
| 219759_at   | <i>ERAP2</i>    | rs2548533  | chr5  | 96,238,401  | 0.31  | 0.05 | 6.0x10 <sup>-8</sup> | ✓ |
| 219759_at   | <i>ERAP2</i>    | rs2549797  | chr5  | 96,245,518  | 0.31  | 0.05 | 6.0x10 <sup>-8</sup> | ✓ |
| 209314_s_at | <i>HBS1L</i>    | rs6569982  | chr6  | 135,256,495 | -0.27 | 0.04 | 6.0x10 <sup>-8</sup> |   |
| 204125_at   | <i>NDUFAF1</i>  | rs1899     | chr15 | 41,689,232  | -0.28 | 0.04 | 6.5x10 <sup>-8</sup> |   |
| 320_at      | <i>PEX6</i>     | rs2274517  | chr6  | 42,932,715  | 0.18  | 0.03 | 6.9x10 <sup>-8</sup> | ✓ |
| 218747_s_at | <i>TAPBPL</i>   | rs2534717  | chr12 | 6,573,749   | 0.31  | 0.05 | 7.0x10 <sup>-8</sup> | ✓ |
| 218948_at   | <i>QRSL1</i>    | rs7750365  | chr6  | 107,089,289 | -0.30 | 0.05 | 7.3x10 <sup>-8</sup> | ✓ |
| 204194_at   | <i>BACH1</i>    | rs1888439  | chr21 | 30,454,457  | 0.16  | 0.03 | 7.3x10 <sup>-8</sup> |   |
| 34764_at    | <i>LARS2</i>    | rs3774692  | chr3  | 45,507,305  | -0.21 | 0.03 | 7.8x10 <sup>-8</sup> | ✓ |
| 218948_at   | <i>QRSL1</i>    | rs3121434  | chr6  | 107,128,371 | -0.28 | 0.04 | 8.1x10 <sup>-8</sup> | ✓ |
| 209314_s_at | <i>HBS1L</i>    | rs4472368  | chr6  | 135,274,232 | -0.24 | 0.04 | 9.1x10 <sup>-8</sup> | ✓ |
| 208982_at   | <i>PECAM1</i>   | rs1122800  | chr17 | 62,391,365  | -0.39 | 0.06 | 9.6x10 <sup>-8</sup> |   |
| 208907_s_at | <i>MRPS18B</i>  | rs1737060  | chr6  | 29,732,969  | -0.29 | 0.05 | 1.1x10 <sup>-7</sup> |   |
| 218505_at   | <i>WDR59</i>    | rs8043624  | chr16 | 74,967,819  | 0.40  | 0.06 | 1.1x10 <sup>-7</sup> |   |
| 206918_s_at | <i>CPNE1</i>    | rs11907811 | chr20 | 34,428,078  | -0.35 | 0.06 | 1.2x10 <sup>-7</sup> | ✓ |
| 218106_s_at | <i>MRPS10</i>   | rs2180174  | chr6  | 42,167,970  | -0.26 | 0.04 | 1.3x10 <sup>-7</sup> | ✓ |
| 204245_s_at | <i>RPP14</i>    | rs2363686  | chr3  | 58,253,885  | -0.24 | 0.04 | 1.3x10 <sup>-7</sup> |   |
| 204245_s_at | <i>RPP14</i>    | rs4681823  | chr3  | 58,199,630  | -0.23 | 0.04 | 1.3x10 <sup>-7</sup> |   |
| 204245_s_at | <i>RPP14</i>    | rs4681824  | chr3  | 58,199,669  | -0.23 | 0.04 | 1.3x10 <sup>-7</sup> |   |
| 219759_at   | <i>ERAP2</i>    | rs1056893  | chr5  | 96,245,439  | 0.31  | 0.05 | 1.3x10 <sup>-7</sup> | ✓ |
| 210790_s_at | <i>SAR1A</i>    | rs6480442  | chr10 | 71,900,246  | 0.32  | 0.05 | 1.4x10 <sup>-7</sup> |   |
| 204245_s_at | <i>RPP14</i>    | rs3773010  | chr3  | 58,269,751  | -0.23 | 0.04 | 1.4x10 <sup>-7</sup> |   |
| 219629_at   | <i>FAM118A</i>  | rs136611   | chr22 | 45,794,283  | 0.44  | 0.07 | 1.4x10 <sup>-7</sup> | ✓ |
| 218106_s_at | <i>MRPS10</i>   | rs6912658  | chr6  | 42,167,161  | -0.25 | 0.04 | 1.5x10 <sup>-7</sup> | ✓ |
| 202070_s_at | <i>IDH3A</i>    | rs9920103  | chr15 | 78,435,527  | 0.27  | 0.05 | 1.7x10 <sup>-7</sup> |   |
| 204125_at   | <i>NDUFAF1</i>  | rs7164211  | chr15 | 41,705,041  | -0.26 | 0.04 | 1.8x10 <sup>-7</sup> |   |
| 204125_at   | <i>NDUFAF1</i>  | rs316611   | chr15 | 41,751,678  | -0.26 | 0.04 | 1.8x10 <sup>-7</sup> |   |
| 204125_at   | <i>NDUFAF1</i>  | rs11854632 | chr15 | 41,682,094  | -0.26 | 0.04 | 1.8x10 <sup>-7</sup> |   |
| 211200_s_at | <i>EFCAB2</i>   | rs6699566  | chr1  | 245,136,331 | 0.20  | 0.03 | 1.9x10 <sup>-7</sup> | ✓ |

## Supplement – Gene Expression and Genetic Variation in Human Atria

|             |                |            |       |             |       |      |                      |   |
|-------------|----------------|------------|-------|-------------|-------|------|----------------------|---|
| 202070_s_at | <i>IDH3A</i>   | rs11855354 | chr15 | 78,443,631  | 0.27  | 0.05 | 2.0x10 <sup>-7</sup> |   |
| 209316_s_at | <i>HBS1L</i>   | rs12526055 | chr6  | 135,325,918 | -0.34 | 0.06 | 2.0x10 <sup>-7</sup> | ✓ |
| 209316_s_at | <i>HBS1L</i>   | rs1014021  | chr6  | 135,334,600 | -0.34 | 0.06 | 2.0x10 <sup>-7</sup> | ✓ |
| 209316_s_at | <i>HBS1L</i>   | rs12661423 | chr6  | 135,349,570 | -0.34 | 0.06 | 2.0x10 <sup>-7</sup> | ✓ |
| 209316_s_at | <i>HBS1L</i>   | rs7750300  | chr6  | 135,350,950 | -0.34 | 0.06 | 2.0x10 <sup>-7</sup> | ✓ |
| 209316_s_at | <i>HBS1L</i>   | rs1590975  | chr6  | 135,352,088 | -0.34 | 0.06 | 2.0x10 <sup>-7</sup> | ✓ |
| 209316_s_at | <i>HBS1L</i>   | rs7741515  | chr6  | 135,374,368 | -0.34 | 0.06 | 2.0x10 <sup>-7</sup> | ✓ |
| 209316_s_at | <i>HBS1L</i>   | rs2150681  | chr6  | 135,375,232 | -0.34 | 0.06 | 2.0x10 <sup>-7</sup> | ✓ |
| 209316_s_at | <i>HBS1L</i>   | rs11754265 | chr6  | 135,356,216 | -0.34 | 0.06 | 2.0x10 <sup>-7</sup> | ✓ |
| 209316_s_at | <i>HBS1L</i>   | rs6923765  | chr6  | 135,335,176 | -0.34 | 0.06 | 2.0x10 <sup>-7</sup> | ✓ |
| 210790_s_at | <i>SAR1A</i>   | rs1046747  | chr10 | 71,910,630  | 0.29  | 0.05 | 2.1x10 <sup>-7</sup> |   |
| 218505_at   | <i>WDR59</i>   | rs9937106  | chr16 | 74,966,742  | 0.39  | 0.06 | 2.3x10 <sup>-7</sup> |   |
| 202378_s_at | <i>LEPROT</i>  | rs9436748  | chr1  | 65,911,672  | -0.38 | 0.06 | 2.5x10 <sup>-7</sup> |   |
| 203674_at   | <i>HELZ</i>    | rs2642066  | chr17 | 65,639,014  | -0.30 | 0.05 | 2.5x10 <sup>-7</sup> |   |
| 201445_at   | <i>CNN3</i>    | rs698969   | chr1  | 95,353,163  | -0.46 | 0.08 | 2.7x10 <sup>-7</sup> |   |
| 204194_at   | <i>BACH1</i>   | rs2255055  | chr21 | 30,537,045  | -0.16 | 0.03 | 2.7x10 <sup>-7</sup> |   |
| 208666_s_at | <i>ST13</i>    | rs5996064  | chr22 | 42,172,080  | -0.40 | 0.07 | 2.7x10 <sup>-7</sup> |   |
| 204194_at   | <i>BACH1</i>   | rs2832198  | chr21 | 30,498,240  | 0.16  | 0.03 | 2.7x10 <sup>-7</sup> |   |
| 202378_s_at | <i>LEPROT</i>  | rs7513047  | chr1  | 65,950,340  | -0.36 | 0.06 | 3.0x10 <sup>-7</sup> |   |
| 207344_at   | <i>AKAP3</i>   | rs7315434  | chr12 | 4,563,810   | 0.87  | 0.14 | 3.0x10 <sup>-7</sup> |   |
| 209316_s_at | <i>HBS1L</i>   | rs6569976  | chr6  | 135,224,753 | -0.36 | 0.06 | 3.1x10 <sup>-7</sup> |   |
| 209314_s_at | <i>HBS1L</i>   | rs4440481  | chr6  | 135,276,696 | -0.24 | 0.04 | 3.3x10 <sup>-7</sup> | ✓ |
| 204083_s_at | <i>TPM2</i>    | rs7389781  | chr9  | 35,573,942  | -0.27 | 0.05 | 3.3x10 <sup>-7</sup> |   |
| 202203_s_at | <i>AMFR</i>    | rs2432540  | chr16 | 56,419,628  | -0.40 | 0.07 | 3.4x10 <sup>-7</sup> | ✓ |
| 218795_at   | <i>ACP6</i>    | rs583583   | chr1  | 147,083,114 | -0.19 | 0.03 | 3.4x10 <sup>-7</sup> |   |
| 203815_at   | <i>GSTT1</i>   | rs17004811 | chr22 | 24,404,830  | -0.81 | 0.14 | 3.5x10 <sup>-7</sup> | ✓ |
| 34764_at    | <i>LARS2</i>   | rs267257   | chr3  | 45,600,868  | 0.18  | 0.03 | 3.6x10 <sup>-7</sup> | ✓ |
| 218948_at   | <i>QRSL1</i>   | rs13218960 | chr6  | 106,983,465 | -0.27 | 0.05 | 3.7x10 <sup>-7</sup> | ✓ |
| 218948_at   | <i>QRSL1</i>   | rs13202942 | chr6  | 106,983,546 | -0.27 | 0.05 | 3.7x10 <sup>-7</sup> | ✓ |
| 206029_at   | <i>ANKRD1</i>  | rs11596991 | chr10 | 92,598,458  | 1.07  | 0.18 | 3.8x10 <sup>-7</sup> |   |
| 202259_s_at | <i>N4BP2L2</i> | rs499966   | chr13 | 32,998,610  | 0.28  | 0.05 | 4.0x10 <sup>-7</sup> |   |
| 206029_at   | <i>ANKRD1</i>  | rs11597471 | chr10 | 92,598,767  | 0.59  | 0.10 | 4.0x10 <sup>-7</sup> |   |
| 206029_at   | <i>ANKRD1</i>  | rs11599902 | chr10 | 92,598,823  | 0.59  | 0.10 | 4.0x10 <sup>-7</sup> |   |
| 205048_s_at | <i>PSPH</i>    | rs7809922  | chr7  | 55,823,581  | 1.23  | 0.21 | 4.2x10 <sup>-7</sup> |   |
| 219759_at   | <i>ERAP2</i>   | rs18059    | chr5  | 96,352,068  | 0.33  | 0.06 | 4.3x10 <sup>-7</sup> | ✓ |
| 34764_at    | <i>LARS2</i>   | rs1877960  | chr3  | 45,496,144  | -0.18 | 0.03 | 4.8x10 <sup>-7</sup> | ✓ |
| 219759_at   | <i>ERAP2</i>   | rs9127     | chr5  | 96,372,165  | 0.33  | 0.06 | 5.0x10 <sup>-7</sup> |   |
| 209316_s_at | <i>HBS1L</i>   | rs9321481  | chr6  | 135,352,648 | -0.33 | 0.06 | 5.0x10 <sup>-7</sup> | ✓ |
| 206918_s_at | <i>CPNE1</i>   | rs2425071  | chr20 | 34,292,961  | -0.30 | 0.05 | 5.1x10 <sup>-7</sup> | ✓ |
| 320_at      | <i>PEX6</i>    | rs9986447  | chr6  | 42,942,779  | 0.18  | 0.03 | 5.2x10 <sup>-7</sup> | ✓ |
| 218106_s_at | <i>MRPS10</i>  | rs9369346  | chr6  | 42,159,132  | -0.24 | 0.04 | 5.2x10 <sup>-7</sup> | ✓ |
| 218106_s_at | <i>MRPS10</i>  | rs2180172  | chr6  | 42,168,542  | -0.24 | 0.04 | 5.2x10 <sup>-7</sup> | ✓ |
| 202378_s_at | <i>LEPROT</i>  | rs7524834  | chr1  | 65,950,230  | -0.34 | 0.06 | 5.3x10 <sup>-7</sup> |   |
| 218948_at   | <i>QRSL1</i>   | rs9480682  | chr6  | 106,983,406 | -0.27 | 0.05 | 5.5x10 <sup>-7</sup> |   |
| 206029_at   | <i>ANKRD1</i>  | rs11186320 | chr10 | 92,576,448  | 0.60  | 0.10 | 5.6x10 <sup>-7</sup> |   |

## Supplement – Gene Expression and Genetic Variation in Human Atria

|             |                  |            |       |             |       |      |                      |   |
|-------------|------------------|------------|-------|-------------|-------|------|----------------------|---|
| 201123_s_at | <i>EIF5A</i>     | rs3809824  | chr17 | 7,238,128   | 0.99  | 0.17 | 5.7x10 <sup>-7</sup> |   |
| 218055_s_at | <i>WDR41</i>     | rs163017   | chr5  | 76,711,667  | -0.35 | 0.06 | 5.9x10 <sup>-7</sup> |   |
| 206029_at   | <i>ANKRD1</i>    | rs4933620  | chr10 | 92,659,865  | 0.83  | 0.15 | 6.4x10 <sup>-7</sup> |   |
| 202378_s_at | <i>LEPROT</i>    | rs17412723 | chr1  | 65,952,741  | -0.37 | 0.06 | 6.5x10 <sup>-7</sup> |   |
| 219759_at   | <i>ERAP2</i>     | rs27397    | chr5  | 96,340,616  | 0.31  | 0.05 | 6.7x10 <sup>-7</sup> | v |
| 201922_at   | <i>NSA2</i>      | rs16872235 | chr5  | 74,037,386  | 0.39  | 0.07 | 6.7x10 <sup>-7</sup> |   |
| 214823_at   | <i>ZNF204P</i>   | rs1555040  | chr6  | 27,314,071  | 0.28  | 0.05 | 7.2x10 <sup>-7</sup> |   |
| 217623_at   | <i>MYLK3</i>     | rs4966616  | chr16 | 46,705,576  | 0.50  | 0.09 | 7.2x10 <sup>-7</sup> |   |
| 209316_s_at | <i>HBS1L</i>     | rs1547247  | chr6  | 135,390,836 | -0.38 | 0.07 | 7.4x10 <sup>-7</sup> |   |
| 203815_at   | <i>GSTT1</i>     | rs1006771  | chr22 | 24,314,006  | -0.73 | 0.13 | 7.4x10 <sup>-7</sup> | v |
| 212183_at   | <i>NUDT4</i>     | rs12422642 | chr12 | 93,924,410  | -0.30 | 0.05 | 7.4x10 <sup>-7</sup> |   |
| 205988_at   | <i>CD84</i>      | rs3795326  | chr1  | 160,466,356 | -0.23 | 0.04 | 7.5x10 <sup>-7</sup> |   |
| 209314_s_at | <i>HBS1L</i>     | rs728030   | chr6  | 135,246,294 | -0.25 | 0.04 | 7.8x10 <sup>-7</sup> |   |
| 205988_at   | <i>CD84</i>      | rs11265412 | chr1  | 160,453,309 | -0.23 | 0.04 | 8.6x10 <sup>-7</sup> |   |
| 201922_at   | <i>NSA2</i>      | rs10515194 | chr5  | 74,059,851  | 0.34  | 0.06 | 8.7x10 <sup>-7</sup> |   |
| 213812_s_at | <i>CAMKK2</i>    | rs11065478 | chr12 | 121,637,133 | 0.35  | 0.06 | 8.8x10 <sup>-7</sup> | v |
| 206505_at   | <i>UGT2B4</i>    | rs11736579 | chr4  | 70,401,931  | -0.41 | 0.07 | 8.9x10 <sup>-7</sup> |   |
| 219509_at   | <i>MYOZ1</i>     | rs12570126 | chr10 | 75,416,789  | 0.67  | 0.12 | 8.9x10 <sup>-7</sup> | v |
| 219932_at   | <i>SLC27A6</i>   | rs11241981 | chr5  | 128,287,181 | 0.42  | 0.08 | 9.0x10 <sup>-7</sup> |   |
| 202259_s_at | <i>N4BP2L2</i>   | rs12427832 | chr13 | 33,219,033  | 0.25  | 0.04 | 9.1x10 <sup>-7</sup> |   |
| 219759_at   | <i>ERAP2</i>     | rs11135484 | chr5  | 96,221,889  | 0.31  | 0.05 | 9.1x10 <sup>-7</sup> |   |
| 65588_at    | <i>LOC388796</i> | rs3752278  | chr20 | 37,050,817  | 0.23  | 0.04 | 9.3x10 <sup>-7</sup> |   |
| 65588_at    | <i>LOC388796</i> | rs3752280  | chr20 | 37,051,007  | 0.23  | 0.04 | 9.3x10 <sup>-7</sup> |   |
| 65588_at    | <i>LOC388796</i> | rs788350   | chr20 | 37,064,636  | 0.23  | 0.04 | 9.3x10 <sup>-7</sup> |   |
| 204245_s_at | <i>RPP14</i>     | rs2138240  | chr3  | 58,256,425  | -0.26 | 0.05 | 9.4x10 <sup>-7</sup> |   |
| 211064_at   | <i>ZNF493</i>    | rs2968084  | chr19 | 21,615,899  | -0.09 | 0.02 | 9.5x10 <sup>-7</sup> | v |
| 218948_at   | <i>QRSL1</i>     | rs9486383  | chr6  | 106,983,359 | -0.28 | 0.05 | 9.6x10 <sup>-7</sup> | v |
| 218948_at   | <i>QRSL1</i>     | rs9320173  | chr6  | 106,984,669 | -0.28 | 0.05 | 9.6x10 <sup>-7</sup> | v |
| 218948_at   | <i>QRSL1</i>     | rs9320174  | chr6  | 106,985,408 | -0.28 | 0.05 | 9.6x10 <sup>-7</sup> | v |
| 202399_s_at | <i>AP3S2</i>     | rs11638138 | chr15 | 90,428,755  | 0.14  | 0.02 | 9.6x10 <sup>-7</sup> | v |
| 206029_at   | <i>ANKRD1</i>    | rs11817364 | chr10 | 92,498,026  | 0.71  | 0.13 | 9.7x10 <sup>-7</sup> |   |
| 218698_at   | <i>APIP</i>      | rs7111607  | chr11 | 34,924,891  | -0.19 | 0.03 | 1.0x10 <sup>-6</sup> | v |
| 217623_at   | <i>MYLK3</i>     | rs7186662  | chr16 | 46,640,695  | 0.49  | 0.09 | 1.0x10 <sup>-6</sup> |   |
| 202378_s_at | <i>LEPROT</i>    | rs11587159 | chr1  | 65,987,205  | -0.40 | 0.07 | 1.1x10 <sup>-6</sup> |   |
| 207728_at   | <i>ATF7IP</i>    | rs4763346  | chr12 | 13,604,672  | 0.15  | 0.03 | 1.1x10 <sup>-6</sup> |   |
| 214012_at   | <i>ERAP1</i>     | rs17401719 | chr5  | 96,089,046  | 0.26  | 0.05 | 1.1x10 <sup>-6</sup> | v |
| 214012_at   | <i>ERAP1</i>     | rs10037212 | chr5  | 96,084,776  | 0.26  | 0.05 | 1.1x10 <sup>-6</sup> |   |
| 214012_at   | <i>ERAP1</i>     | rs1862609  | chr5  | 96,086,690  | 0.26  | 0.05 | 1.1x10 <sup>-6</sup> |   |
| 206029_at   | <i>ANKRD1</i>    | rs10881844 | chr10 | 92,648,024  | 0.58  | 0.10 | 1.1x10 <sup>-6</sup> |   |
| 210001_s_at | <i>SOCS1</i>     | rs243325   | chr16 | 11,354,497  | 0.19  | 0.03 | 1.2x10 <sup>-6</sup> |   |
| 218698_at   | <i>APIP</i>      | rs1326942  | chr11 | 34,916,785  | -0.18 | 0.03 | 1.2x10 <sup>-6</sup> | v |
| 214012_at   | <i>ERAP1</i>     | rs731827   | chr5  | 96,087,015  | 0.29  | 0.05 | 1.2x10 <sup>-6</sup> | v |
| 211200_s_at | <i>EFCAB2</i>    | rs2050632  | chr1  | 245,159,567 | 0.19  | 0.04 | 1.3x10 <sup>-6</sup> | v |
| 211200_s_at | <i>EFCAB2</i>    | rs522595   | chr1  | 245,159,739 | 0.19  | 0.04 | 1.3x10 <sup>-6</sup> | v |
| 211200_s_at | <i>EFCAB2</i>    | rs644341   | chr1  | 245,159,822 | 0.19  | 0.04 | 1.3x10 <sup>-6</sup> | v |

## Supplement – Gene Expression and Genetic Variation in Human Atria

|             |               |            |       |             |       |      |                      |   |
|-------------|---------------|------------|-------|-------------|-------|------|----------------------|---|
| 211200_s_at | <i>EFCAB2</i> | rs626070   | chr1  | 245,167,331 | 0.19  | 0.04 | 1.3x10 <sup>-6</sup> | ✓ |
| 221562_s_at | <i>SIRT3</i>  | rs12363280 | chr11 | 231,980     | 0.22  | 0.04 | 1.3x10 <sup>-6</sup> |   |
| 34764_at    | <i>LARS2</i>  | rs12638088 | chr3  | 45,537,973  | -0.19 | 0.03 | 1.3x10 <sup>-6</sup> | ✓ |
| 34764_at    | <i>LARS2</i>  | rs3821895  | chr3  | 45,587,983  | -0.19 | 0.03 | 1.3x10 <sup>-6</sup> | ✓ |
| 206918_s_at | <i>CPNE1</i>  | rs2425132  | chr20 | 34,338,390  | -0.32 | 0.06 | 1.4x10 <sup>-6</sup> | ✓ |
| 202070_s_at | <i>IDH3A</i>  | rs12903696 | chr15 | 78,439,018  | 0.25  | 0.05 | 1.4x10 <sup>-6</sup> |   |
| 202070_s_at | <i>IDH3A</i>  | rs8032618  | chr15 | 78,452,003  | 0.25  | 0.05 | 1.4x10 <sup>-6</sup> |   |
| 206918_s_at | <i>CPNE1</i>  | rs6060692  | chr20 | 34,517,925  | -0.28 | 0.05 | 1.5x10 <sup>-6</sup> | ✓ |
| 218746_at   | <i>TAPBPL</i> | rs2534717  | chr12 | 6,573,749   | 0.26  | 0.05 | 1.5x10 <sup>-6</sup> | ✓ |
| 202554_s_at | <i>GSTM3</i>  | rs1887547  | chr1  | 110,295,772 | -0.27 | 0.05 | 1.5x10 <sup>-6</sup> | ✓ |
| 209314_s_at | <i>HBS1L</i>  | rs12526055 | chr6  | 135,325,918 | -0.22 | 0.04 | 1.6x10 <sup>-6</sup> | ✓ |
| 209314_s_at | <i>HBS1L</i>  | rs1014021  | chr6  | 135,334,600 | -0.22 | 0.04 | 1.6x10 <sup>-6</sup> | ✓ |
| 209314_s_at | <i>HBS1L</i>  | rs12661423 | chr6  | 135,349,570 | -0.22 | 0.04 | 1.6x10 <sup>-6</sup> | ✓ |
| 209314_s_at | <i>HBS1L</i>  | rs7750300  | chr6  | 135,350,950 | -0.22 | 0.04 | 1.6x10 <sup>-6</sup> | ✓ |
| 209314_s_at | <i>HBS1L</i>  | rs1590975  | chr6  | 135,352,088 | -0.22 | 0.04 | 1.6x10 <sup>-6</sup> | ✓ |
| 209314_s_at | <i>HBS1L</i>  | rs7741515  | chr6  | 135,374,368 | -0.22 | 0.04 | 1.6x10 <sup>-6</sup> | ✓ |
| 209314_s_at | <i>HBS1L</i>  | rs2150681  | chr6  | 135,375,232 | -0.22 | 0.04 | 1.6x10 <sup>-6</sup> | ✓ |
| 209314_s_at | <i>HBS1L</i>  | rs6923765  | chr6  | 135,335,176 | -0.22 | 0.04 | 1.6x10 <sup>-6</sup> | ✓ |
| 209314_s_at | <i>HBS1L</i>  | rs11754265 | chr6  | 135,356,216 | -0.22 | 0.04 | 1.6x10 <sup>-6</sup> | ✓ |
| 218746_at   | <i>TAPBPL</i> | rs2079867  | chr12 | 6,622,111   | 0.25  | 0.05 | 1.6x10 <sup>-6</sup> | ✓ |
| 203628_at   | <i>IGF1R</i>  | rs7162314  | chr15 | 99,489,916  | 0.64  | 0.12 | 1.6x10 <sup>-6</sup> |   |
| 217623_at   | <i>MYLK3</i>  | rs40355    | chr16 | 46,792,881  | 0.49  | 0.09 | 1.6x10 <sup>-6</sup> |   |
| 203815_at   | <i>GSTT1</i>  | rs2000467  | chr22 | 24,241,533  | -0.73 | 0.13 | 1.6x10 <sup>-6</sup> | ✓ |
| 206029_at   | <i>ANKRD1</i> | rs7089533  | chr10 | 92,605,364  | 0.81  | 0.15 | 1.7x10 <sup>-6</sup> |   |
| 218795_at   | <i>ACP6</i>   | rs12037951 | chr1  | 147,102,854 | -0.20 | 0.04 | 1.7x10 <sup>-6</sup> | ✓ |
| 212447_at   | <i>KBTBD2</i> | rs17335094 | chr7  | 32,017,493  | 0.13  | 0.02 | 1.8x10 <sup>-6</sup> |   |
| 218698_at   | <i>APIP</i>   | rs3763934  | chr11 | 34,937,076  | -0.18 | 0.03 | 1.9x10 <sup>-6</sup> | ✓ |
| 212761_at   | <i>TCF7L2</i> | rs1421050  | chr10 | 113,754,544 | -0.29 | 0.05 | 1.9x10 <sup>-6</sup> |   |
| 217254_s_at | <i>EPO</i>    | rs11977827 | chr7  | 99,526,316  | 0.27  | 0.05 | 2.0x10 <sup>-6</sup> |   |
| 221562_s_at | <i>SIRT3</i>  | rs7946716  | chr11 | 224,676     | 0.22  | 0.04 | 2.0x10 <sup>-6</sup> |   |
| 211200_s_at | <i>EFCAB2</i> | rs10927369 | chr1  | 245,179,960 | 0.20  | 0.04 | 2.1x10 <sup>-6</sup> | ✓ |
| 218698_at   | <i>APIP</i>   | rs2915223  | chr11 | 34,914,137  | -0.17 | 0.03 | 2.1x10 <sup>-6</sup> | ✓ |
| 211276_at   | <i>TCEAL2</i> | rs4898338  | chrX  | 101,413,853 | -0.66 | 0.12 | 2.1x10 <sup>-6</sup> |   |
| 34764_at    | <i>LARS2</i>  | rs2276860  | chr3  | 45,559,621  | -0.20 | 0.04 | 2.2x10 <sup>-6</sup> | ✓ |
| 220061_at   | <i>ACSM5</i>  | rs12103211 | chr16 | 20,435,262  | 0.40  | 0.07 | 2.2x10 <sup>-6</sup> |   |
| 201283_s_at | <i>TRAK1</i>  | rs734898   | chr3  | 42,263,535  | 0.26  | 0.05 | 2.3x10 <sup>-6</sup> |   |
| 209314_s_at | <i>HBS1L</i>  | rs9321481  | chr6  | 135,352,648 | -0.22 | 0.04 | 2.4x10 <sup>-6</sup> | ✓ |

\*✓ represents that the eQTL has already been reported in other tissues from eQTL Browser

(<http://eqtl.uchicago.edu/Home.html>)

## Supplement – Gene Expression and Genetic Variation in Human Atria

**Supplemental Table 4.** Differentially expressed transcripts between LA and RA identified from samples from heart transplantation (total 70 transcripts), comparing to 109 differentially expressed transcripts identified from all samples.

| ID          | Gene Symbol     | Left Atrium           |       | Right Atrium          |      | P value<br>Left atrium vs.<br>Right Atrium |
|-------------|-----------------|-----------------------|-------|-----------------------|------|--------------------------------------------|
|             |                 | Average<br>Expression | SD    | Average<br>Expression | SD   |                                            |
| 220491_at   | <i>HAMP</i>     | 7.65                  | 9.28  | 0.71                  | 0.90 | 7.9x10 <sup>-16</sup>                      |
| 207069_s_at | <i>SMAD6</i>    | 7.12                  | 7.75  | 0.33                  | 0.32 | 4.3x10 <sup>-15</sup>                      |
| 204790_at   | <i>SMAD7</i>    | 7.46                  | 8.17  | 0.43                  | 0.39 | 4.4x10 <sup>-13</sup>                      |
| 204811_s_at | <i>CACNA2D2</i> | 7.19                  | 7.77  | 0.33                  | 0.39 | 9.3x10 <sup>-12</sup>                      |
| 219873_at   | <i>COLEC11</i>  | 7.58                  | 8.19  | 0.41                  | 0.35 | 1.1x10 <sup>-11</sup>                      |
| 211959_at   | <i>IGFBP5</i>   | 10.50                 | 11.13 | 0.39                  | 0.42 | 2.5x10 <sup>-11</sup>                      |
| 201272_at   | <i>AKR1B1</i>   | 9.79                  | 9.29  | 0.37                  | 0.27 | 3.4x10 <sup>-11</sup>                      |
| 203146_s_at | <i>GABBR1</i>   | 7.70                  | 7.90  | 0.13                  | 0.14 | 5.2x10 <sup>-11</sup>                      |
| 204776_at   | <i>THBS4</i>    | 8.78                  | 7.74  | 0.68                  | 0.68 | 5.8x10 <sup>-11</sup>                      |
| 208292_at   | <i>BMP10</i>    | 6.79                  | 8.13  | 0.73                  | 1.00 | 6.0x10 <sup>-11</sup>                      |
| 210372_s_at | <i>TPD52L1</i>  | 6.20                  | 5.65  | 0.37                  | 0.34 | 7.1x10 <sup>-11</sup>                      |
| 202912_at   | <i>ADM</i>      | 8.45                  | 9.15  | 0.50                  | 0.44 | 9.8x10 <sup>-11</sup>                      |
| 201565_s_at | <i>ID2</i>      | 7.64                  | 8.28  | 0.45                  | 0.41 | 1.3x10 <sup>-10</sup>                      |
| 213094_at   | <i>GPR126</i>   | 4.86                  | 5.42  | 0.35                  | 0.41 | 1.9x10 <sup>-10</sup>                      |
| 205554_s_at | <i>DNASE1L3</i> | 6.44                  | 6.92  | 0.29                  | 0.37 | 2.9x10 <sup>-10</sup>                      |
| 207558_s_at | <i>PITX2</i>    | 4.01                  | 3.63  | 0.31                  | 0.20 | 7.2x10 <sup>-10</sup>                      |
| 203700_s_at | <i>DIO2</i>     | 5.67                  | 5.39  | 0.20                  | 0.20 | 1.0x10 <sup>-9</sup>                       |
| 219719_at   | <i>HIGD1B</i>   | 7.43                  | 7.10  | 0.25                  | 0.24 | 1.6x10 <sup>-9</sup>                       |
| 203786_s_at | <i>TPD52L1</i>  | 8.57                  | 8.09  | 0.38                  | 0.33 | 3.6x10 <sup>-9</sup>                       |
| 206050_s_at | <i>RNH1</i>     | 8.69                  | 8.98  | 0.20                  | 0.23 | 3.9x10 <sup>-9</sup>                       |
| 208335_s_at | <i>DARC</i>     | 7.63                  | 7.04  | 0.45                  | 0.44 | 6.9x10 <sup>-9</sup>                       |
| 211958_at   | <i>IGFBP5</i>   | 7.56                  | 8.03  | 0.31                  | 0.41 | 1.2x10 <sup>-8</sup>                       |
| 205374_at   | <i>SLN</i>      | 10.25                 | 11.05 | 0.71                  | 0.53 | 1.5x10 <sup>-8</sup>                       |
| 209047_at   | <i>AQP1</i>     | 9.30                  | 8.93  | 0.28                  | 0.30 | 1.5x10 <sup>-8</sup>                       |
| 201809_s_at | <i>ENG</i>      | 9.14                  | 9.62  | 0.41                  | 0.33 | 1.6x10 <sup>-8</sup>                       |
| 210036_s_at | <i>KCNH2</i>    | 8.42                  | 8.71  | 0.25                  | 0.21 | 2.4x10 <sup>-8</sup>                       |
| 206768_at   | <i>RPL3L</i>    | 8.05                  | 7.67  | 0.30                  | 0.31 | 3.1x10 <sup>-8</sup>                       |
| 201042_at   | <i>TGM2</i>     | 8.85                  | 9.13  | 0.22                  | 0.24 | 5.0x10 <sup>-8</sup>                       |
| 204174_at   | <i>ALOX5AP</i>  | 7.26                  | 6.91  | 0.31                  | 0.28 | 6.9x10 <sup>-8</sup>                       |
| 221933_at   | <i>NLGN4X</i>   | 4.00                  | 4.34  | 0.20                  | 0.34 | 1.2x10 <sup>-7</sup>                       |
| 203637_s_at | <i>MID1</i>     | 6.68                  | 7.02  | 0.30                  | 0.28 | 1.2x10 <sup>-7</sup>                       |
| 209291_at   | <i>ID4</i>      | 6.46                  | 7.05  | 0.52                  | 0.51 | 1.7x10 <sup>-7</sup>                       |
| 204099_at   | <i>SMARCD3</i>  | 8.17                  | 8.53  | 0.29                  | 0.33 | 1.8x10 <sup>-7</sup>                       |
| 201313_at   | <i>ENO2</i>     | 6.47                  | 6.80  | 0.27                  | 0.30 | 1.9x10 <sup>-7</sup>                       |
| 219985_at   | <i>HS3ST3A1</i> | 3.97                  | 4.21  | 0.15                  | 0.24 | 2.0x10 <sup>-7</sup>                       |
| 210095_s_at | <i>IGFBP3</i>   | 8.87                  | 9.45  | 0.53                  | 0.48 | 2.8x10 <sup>-7</sup>                       |
| 218856_at   | <i>TNFRSF21</i> | 7.27                  | 6.91  | 0.29                  | 0.34 | 2.9x10 <sup>-7</sup>                       |
| 1007_s_at   | <i>DDR1</i>     | 7.76                  | 7.98  | 0.16                  | 0.22 | 3.0x10 <sup>-7</sup>                       |

## Supplement – Gene Expression and Genetic Variation in Human Atria

|             |                 |       |       |      |      |                      |
|-------------|-----------------|-------|-------|------|------|----------------------|
| 213135_at   | <i>TIAM1</i>    | 5.33  | 5.73  | 0.35 | 0.36 | 3.1x10 <sup>-7</sup> |
| 202949_s_at | <i>FHL2</i>     | 9.33  | 10.04 | 0.70 | 0.54 | 3.3x10 <sup>-7</sup> |
| 213974_at   | <i>ADAMTSL3</i> | 6.42  | 6.82  | 0.35 | 0.36 | 3.9x10 <sup>-7</sup> |
| 207016_s_at | <i>ALDH1A2</i>  | 7.83  | 8.23  | 0.34 | 0.37 | 4.0x10 <sup>-7</sup> |
| 222020_s_at | <i>NTM</i>      | 4.94  | 5.23  | 0.19 | 0.31 | 4.6x10 <sup>-7</sup> |
| 219728_at   | <i>MYOT</i>     | 7.43  | 6.39  | 1.16 | 0.58 | 6.4x10 <sup>-7</sup> |
| 212775_at   | <i>OBSL1</i>    | 6.53  | 6.91  | 0.33 | 0.37 | 7.1x10 <sup>-7</sup> |
| 203619_s_at | <i>FAIM2</i>    | 6.05  | 6.43  | 0.32 | 0.38 | 7.1x10 <sup>-7</sup> |
| 204345_at   | <i>COL16A1</i>  | 6.21  | 6.49  | 0.21 | 0.28 | 7.6x10 <sup>-7</sup> |
| 204606_at   | <i>CCL21</i>    | 7.24  | 6.92  | 0.33 | 0.24 | 7.8x10 <sup>-7</sup> |
| 209409_at   | <i>GRB10</i>    | 8.26  | 8.61  | 0.35 | 0.26 | 8.0x10 <sup>-7</sup> |
| 209292_at   | <i>ID4</i>      | 4.28  | 4.73  | 0.36 | 0.46 | 8.3x10 <sup>-7</sup> |
| 205990_s_at | <i>WNT5A</i>    | 4.86  | 5.04  | 0.13 | 0.19 | 9.7x10 <sup>-7</sup> |
| 210299_s_at | <i>FHL1</i>     | 8.63  | 8.18  | 0.45 | 0.39 | 1.4x10 <sup>-6</sup> |
| 203549_s_at | <i>LPL</i>      | 10.46 | 9.79  | 0.57 | 0.69 | 1.4x10 <sup>-6</sup> |
| 203636_at   | <i>MID1</i>     | 6.99  | 7.24  | 0.22 | 0.25 | 1.5x10 <sup>-6</sup> |
| 201952_at   | <i>ALCAM</i>    | 6.60  | 7.04  | 0.34 | 0.48 | 1.5x10 <sup>-6</sup> |
| 209469_at   | <i>GPM6A</i>    | 4.19  | 4.35  | 0.14 | 0.16 | 1.5x10 <sup>-6</sup> |
| 206403_at   | <i>ZNF536</i>   | 5.46  | 5.66  | 0.16 | 0.20 | 1.7x10 <sup>-6</sup> |
| 205984_at   | <i>CRHBP</i>    | 5.92  | 6.20  | 0.23 | 0.30 | 1.7x10 <sup>-6</sup> |
| 214505_s_at | <i>FHL1</i>     | 10.30 | 9.78  | 0.49 | 0.50 | 1.7x10 <sup>-6</sup> |
| 217848_s_at | <i>PPA1</i>     | 9.54  | 9.21  | 0.31 | 0.31 | 1.7x10 <sup>-6</sup> |
| 205127_at   | <i>PTGS1</i>    | 6.15  | 6.38  | 0.21 | 0.21 | 2.2x10 <sup>-6</sup> |
| 214533_at   | <i>CMA1</i>     | 6.08  | 5.90  | 0.16 | 0.17 | 2.2x10 <sup>-6</sup> |
| 204931_at   | <i>TCF21</i>    | 5.98  | 6.33  | 0.31 | 0.38 | 2.3x10 <sup>-6</sup> |
| 203886_s_at | <i>FBLN2</i>    | 7.91  | 8.24  | 0.35 | 0.31 | 2.5x10 <sup>-6</sup> |
| 206637_at   | <i>P2RY14</i>   | 4.35  | 3.91  | 0.53 | 0.24 | 2.8x10 <sup>-6</sup> |
| 203813_s_at | <i>SLIT3</i>    | 7.41  | 7.74  | 0.34 | 0.31 | 3.1x10 <sup>-6</sup> |
| 209706_at   | <i>NKX3-1</i>   | 5.54  | 5.71  | 0.15 | 0.18 | 3.1x10 <sup>-6</sup> |
| 203425_s_at | <i>IGFBP5</i>   | 6.52  | 6.80  | 0.25 | 0.29 | 3.4x10 <sup>-6</sup> |
| 203088_at   | <i>FBLN5</i>    | 9.20  | 9.48  | 0.26 | 0.29 | 3.7x10 <sup>-6</sup> |
| 203548_s_at | <i>LPL</i>      | 9.55  | 8.81  | 0.67 | 0.80 | 3.7x10 <sup>-6</sup> |



## Supplement – Gene Expression and Genetic Variation in Human Atria

**Supplemental Table 5.** Top 10 differentially expressed genes between LA and RA in samples from healthy donors. None of them reached the Bonferroni p-value cutoff ( $P < 4.2 \times 10^{-6}$ ).

| ID          | Gene Symbol   | Left Atrium           |      | Right Atrium          |      | P value<br>Left atrium vs.<br>Right Atrium |
|-------------|---------------|-----------------------|------|-----------------------|------|--------------------------------------------|
|             |               | Average<br>Expression | SD   | Average<br>Expression | SD   |                                            |
| 202357_s_at | <i>CFB</i>    | 6.29                  | 0.12 | 6.75                  | 0.09 | $1.1 \times 10^{-4}$                       |
| 202315_s_at | <i>BCR</i>    | 6.50                  | 0.05 | 6.76                  | 0.05 | $1.3 \times 10^{-4}$                       |
| 201951_at   | <i>ALCAM</i>  | 4.06                  | 0.12 | 4.38                  | 0.05 | $5.7 \times 10^{-4}$                       |
| 215783_s_at | <i>ALPL</i>   | 5.27                  | 0.15 | 5.68                  | 0.06 | $5.8 \times 10^{-4}$                       |
| 210511_s_at | <i>INHBA</i>  | 5.85                  | 0.17 | 6.47                  | 0.16 | $6.4 \times 10^{-4}$                       |
| 202611_s_at | <i>MED14</i>  | 3.94                  | 0.07 | 4.13                  | 0.04 | $8.6 \times 10^{-4}$                       |
| 202806_at   | <i>DBN1</i>   | 5.78                  | 0.11 | 6.06                  | 0.03 | $1.0 \times 10^{-3}$                       |
| 209169_at   | <i>GPM6B</i>  | 4.70                  | 0.09 | 4.96                  | 0.08 | $1.3 \times 10^{-3}$                       |
| 201158_at   | <i>NMT1</i>   | 6.63                  | 0.11 | 6.94                  | 0.09 | $1.5 \times 10^{-3}$                       |
| 221933_at   | <i>NLGN4X</i> | 3.96                  | 0.19 | 4.48                  | 0.15 | $1.5 \times 10^{-3}$                       |

**Supplemental Table 6.** qPCR primer pairs for validation

|                   |                                  |
|-------------------|----------------------------------|
| MYOZ1-forward-1   | CTTCCCAAATATAAGTCCTTCAACAG       |
| MYOZ1-reverse-1   | GGAGAGGTTTTGGTTGTAGAGG           |
| MYOZ1-forward-2   | CAGATGAGGGTGGAGAAGTTT            |
| MYOZ1-reverse-2   | GCTCTTGCTGTATGAGAATCCC           |
| MYOZ1-forward-3   | designed and validated by BioRad |
| MYOZ1-reverse-3   | designed and validated by BioRad |
| SYNPO2L-forward-1 | GAGACCTTTGAGCCCATCAG             |
| SYNPO2L-reverse-1 | CTTGGCCTCTTTTATGCTCTTC           |
| SYNPO2L-forward-2 | AGCAGAGGAAACCGTTACAG             |
| SYNPO2L-reverse-2 | GAGAGGTTGGTGCAAGAGAC             |
| TBP-forward       | GAATATAATCCCAAGCGTTTG            |
| TBP-reverse       | ACTTCACATCACAGCTCCCC             |
| HPRT-forward      | ATCAGACTGAAGAGCTATTGTAATGACCA    |
| HPRT-reverse      | TGGCTTATATCCAACACTTCGTG          |

## Supplement – Gene Expression and Genetic Variation in Human Atria

**Table 7a.** Genes differentially expressed in heart failure cases vs. referents in LA

| Gene ID     | Gene Symbol   | Cases                 |      | Referents             |      | P value<br>Heart failure cases<br>vs. referents |
|-------------|---------------|-----------------------|------|-----------------------|------|-------------------------------------------------|
|             |               | Average<br>Expression | SD   | Average<br>Expression | SD   |                                                 |
| 204208_at   | <i>RNGTT</i>  | 4.15                  | 0.10 | 4.05                  | 0.02 | 1.2x10 <sup>-7</sup>                            |
| 201426_s_at | <i>VIM</i>    | 11.41                 | 0.29 | 11.11                 | 0.07 | 1.2x10 <sup>-6</sup>                            |
| 218595_s_at | <i>HEATR1</i> | 6.82                  | 0.11 | 6.97                  | 0.04 | 1.7x10 <sup>-6</sup>                            |

**Table 7b.** Genes differentially expressed in heart failure cases vs. referents in RA

| Gene ID     | Gene Symbol     | Cases                 |      | Referents             |      | P value<br>Heart failure cases<br>vs. referents |
|-------------|-----------------|-----------------------|------|-----------------------|------|-------------------------------------------------|
|             |                 | Average<br>Expression | SD   | Average<br>Expression | SD   |                                                 |
| 201416_at   | <i>SOX4</i>     | 5.59                  | 0.17 | 5.35                  | 0.01 | 1.5x10 <sup>-12</sup>                           |
| 203241_at   | <i>UVRAG</i>    | 6.32                  | 0.13 | 6.11                  | 0.02 | 1.2x10 <sup>-9</sup>                            |
| 222043_at   | <i>CLU</i>      | 7.01                  | 0.48 | 6.49                  | 0.05 | 8.0x10 <sup>-9</sup>                            |
| 211340_s_at | <i>MCAM</i>     | 8.69                  | 0.20 | 8.40                  | 0.04 | 1.3x10 <sup>-8</sup>                            |
| 219495_s_at | <i>ZNF180</i>   | 4.66                  | 0.15 | 4.52                  | 0.02 | 1.4x10 <sup>-7</sup>                            |
| 201540_at   | <i>FHL1</i>     | 11.41                 | 0.23 | 11.16                 | 0.04 | 2.2x10 <sup>-7</sup>                            |
| 202806_at   | <i>DBN1</i>     | 5.87                  | 0.14 | 6.06                  | 0.03 | 2.3x10 <sup>-7</sup>                            |
| 209596_at   | <i>MXRA5</i>    | 8.22                  | 0.58 | 7.61                  | 0.09 | 3.4x10 <sup>-7</sup>                            |
| 218856_at   | <i>TNFRSF21</i> | 6.91                  | 0.34 | 6.57                  | 0.05 | 3.5x10 <sup>-7</sup>                            |
| 217234_s_at | <i>EZR</i>      | 6.28                  | 0.42 | 6.72                  | 0.07 | 4.0x10 <sup>-7</sup>                            |
| 213735_s_at | <i>COX5B</i>    | 11.34                 | 0.16 | 11.53                 | 0.03 | 4.4x10 <sup>-7</sup>                            |
| 215235_at   | <i>SPTAN1</i>   | 9.10                  | 0.22 | 8.86                  | 0.04 | 8.6x10 <sup>-7</sup>                            |
| 202780_at   | <i>OXCT1</i>    | 8.87                  | 0.26 | 8.61                  | 0.04 | 9.4x10 <sup>-7</sup>                            |
| 209024_s_at | <i>SYNCRIP</i>  | 6.22                  | 0.37 | 6.52                  | 0.03 | 1.8x10 <sup>-6</sup>                            |
| 201621_at   | <i>NBL1</i>     | 7.93                  | 0.26 | 7.67                  | 0.05 | 1.9x10 <sup>-6</sup>                            |
| 213180_s_at | <i>GOSR2</i>    | 6.38                  | 0.18 | 6.53                  | 0.02 | 3.6x10 <sup>-6</sup>                            |

## Supplement – Gene Expression and Genetic Variation in Human Atria

**Supplemental Table 8.** Differentially expressed genes ( $P < 4.2 \times 10^{-6}$ ) in patients with history of AF cases in RA by the leave-one-out cross validation. The two significant genes from the whole dataset, *DEXI* and *PPM1H*, were just picked up by 2 out of 9 permutations, suggesting that the lack of significant genes is likely attributable to the small sample size.

| ID          | Gene Symbol    | Number of permutations <sup>+</sup><br>(total n=9) |
|-------------|----------------|----------------------------------------------------|
| 203733_at   | <i>DEXI</i>    | 2                                                  |
| 212686_at   | <i>PPM1H</i>   | 2                                                  |
| 201690_s_at | <i>TPD52</i>   | 1                                                  |
| 202591_s_at | <i>SSBP1</i>   | 1                                                  |
| 205530_at   | <i>ETFDH</i>   | 1                                                  |
| 208782_at   | <i>FSTL1</i>   | 1                                                  |
| 209899_s_at | <i>PUF60</i>   | 1                                                  |
| 217678_at   | <i>SLC7A11</i> | 1                                                  |
| 219059_s_at | <i>LYVE1</i>   | 1                                                  |
| 33494_at    | <i>ETFDH</i>   | 1                                                  |

<sup>+</sup>It indicates that the number of permutations when the gene was considered as differential expressed.

**Supplemental Table 9.** Top 10 differentially expressed genes between LA and RA in samples with history of AF. None of them reached the Bonferroni p-value cutoff ( $P < 4.2 \times 10^{-6}$ ).

| ID          | Gene Symbol    | Left Atrium        |      | Right Atrium       |      | P value<br>Left atrium vs.<br>Right Atrium |
|-------------|----------------|--------------------|------|--------------------|------|--------------------------------------------|
|             |                | Average Expression | SD   | Average Expression | SD   |                                            |
| 207433_at   | <i>IL10</i>    | 4.42               | 0.08 | 4.64               | 0.11 | $3.0 \times 10^{-4}$                       |
| 209047_at   | <i>AQP1</i>    | 9.26               | 0.21 | 8.85               | 0.17 | $4.1 \times 10^{-4}$                       |
| 205431_s_at | <i>BMP5</i>    | 6.35               | 0.17 | 6.03               | 0.14 | $5.0 \times 10^{-4}$                       |
| 203700_s_at | <i>DIO2</i>    | 5.71               | 0.19 | 5.38               | 0.12 | $6.9 \times 10^{-4}$                       |
| 207228_at   | <i>PRKACG</i>  | 6.24               | 0.12 | 6.04               | 0.10 | $1.2 \times 10^{-3}$                       |
| 214081_at   | <i>PLXDC1</i>  | 6.40               | 0.07 | 6.17               | 0.14 | $1.2 \times 10^{-3}$                       |
| 211594_s_at | <i>MRPL9</i>   | 6.82               | 0.12 | 6.64               | 0.07 | $1.7 \times 10^{-3}$                       |
| 207069_s_at | <i>SMAD6</i>   | 7.18               | 0.34 | 7.79               | 0.36 | $1.9 \times 10^{-3}$                       |
| 201527_at   | <i>ATP6V1F</i> | 9.39               | 0.15 | 9.14               | 0.13 | $2.0 \times 10^{-3}$                       |
| 211113_s_at | <i>ABCG1</i>   | 6.44               | 0.16 | 6.17               | 0.16 | $2.8 \times 10^{-3}$                       |

## Supplement – Gene Expression and Genetic Variation in Human Atria

**Supplemental Figure 1.** Principle component analysis of transcriptional profiles. Each point represents one sample, mapping to the first two principle components (PCs). Red points represent samples from heart transplantation surgery, whereas green points represent samples from healthy donors. No significant distinction could be found between two groups.

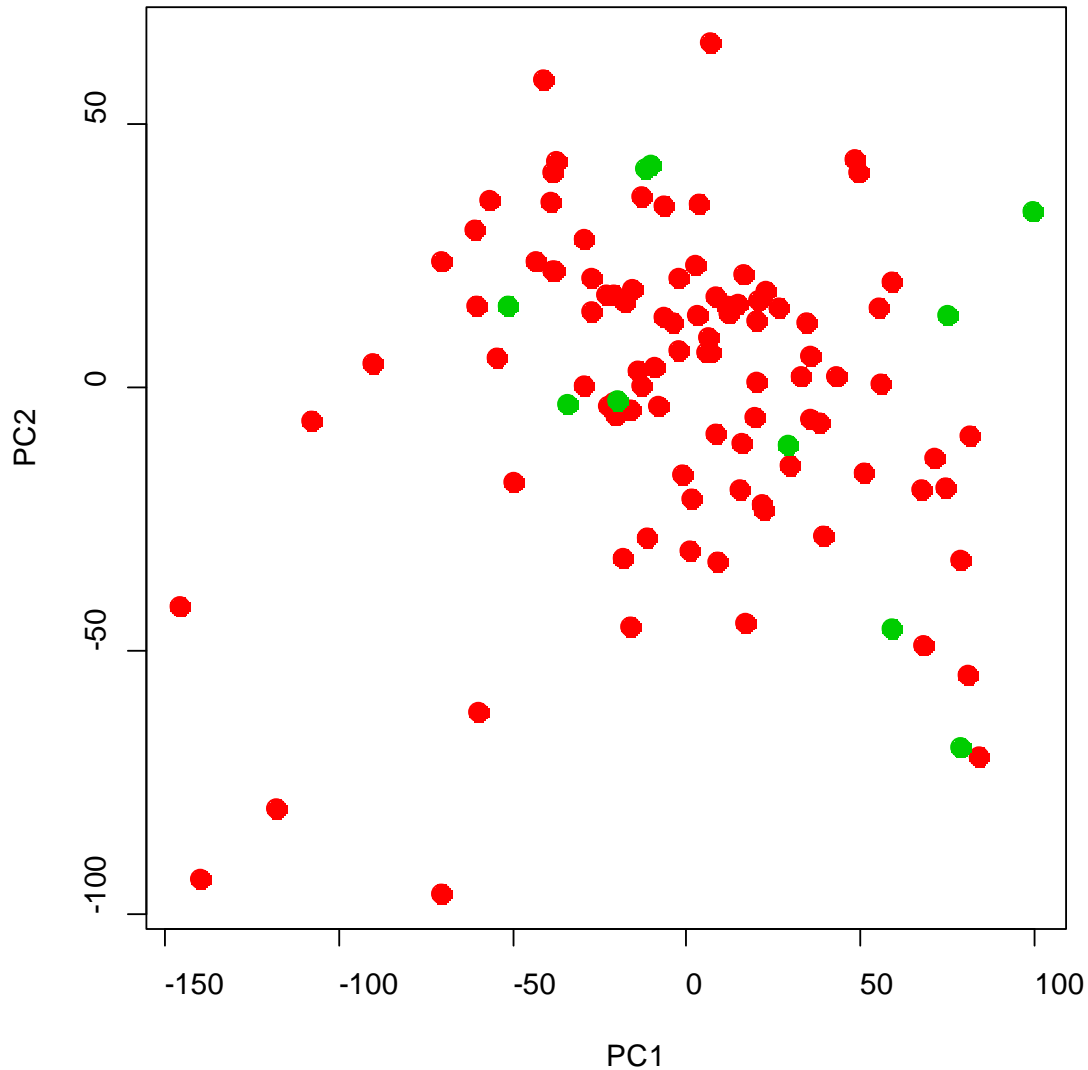

### References

1. Hsu J, Hanna P, Van Wagoner DR, et al. Whole genome expression differences in human left and right atria ascertained by RNA sequencing. *Circ Cardiovasc Genet* Jun 2012;5:327-335.
2. Schadt EE, Molony C, Chudin E, et al. Mapping the genetic architecture of gene expression in human liver. *PLoS Biol* May 6 2008;6:e107.
3. Irizarry RA, Hobbs B, Collin F, et al. Exploration, normalization, and summaries of high density oligonucleotide array probe level data. *Biostatistics (Oxford, England)* Apr 2003;4:249-264.
